# Supplementary material
Source: PubMed Central journal article supplement (PMC9472299)
Supplement: NIHMS1831309-supplement-SM3.pdf [file NIHMS1831309-supplement-SM3.pdf]

# Quality of published systematic reviews and meta-analyses in medicine and environmental health

Matthew J. Page  
Research Fellow

Research Methodology  
School of Public Health & Preventive Medicine  
Monash University

[matthew.page@monash.edu](mailto:matthew.page@monash.edu)

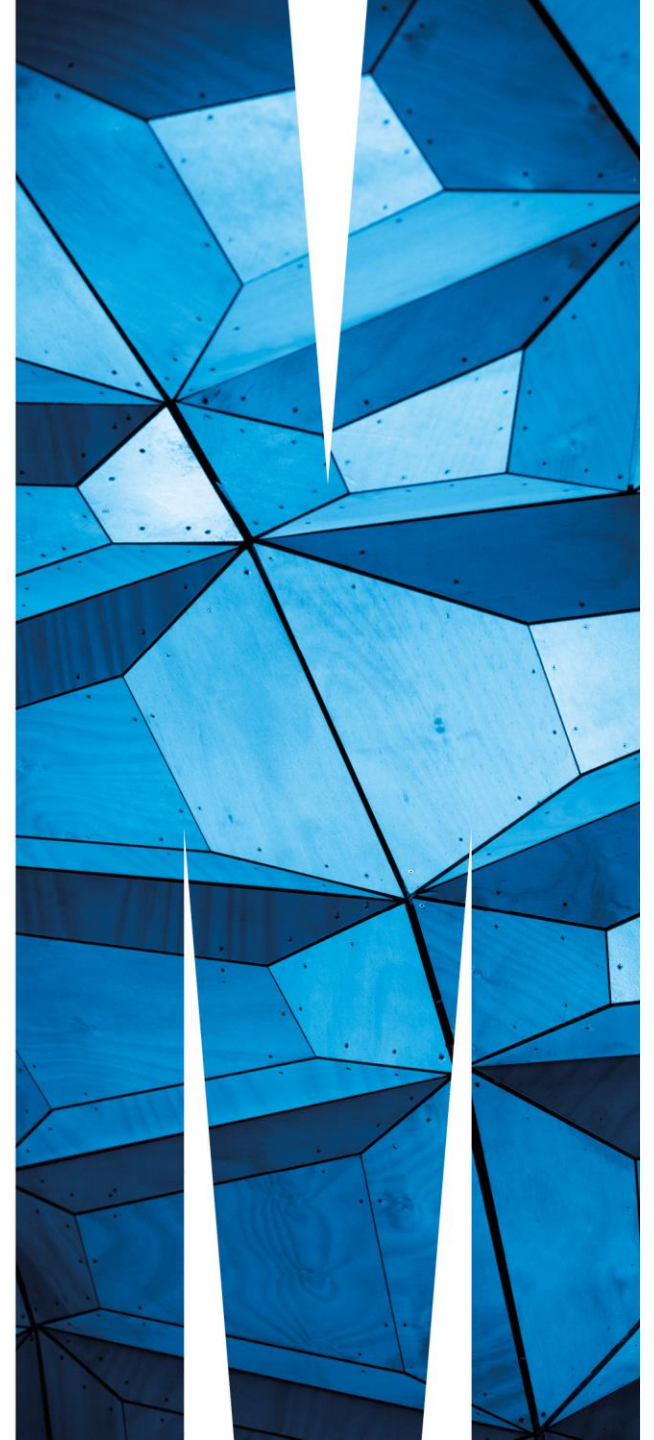

# Declarations

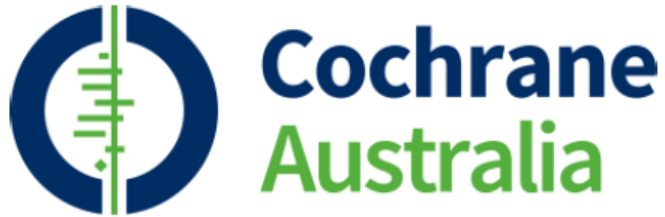

N | H | M | R | C

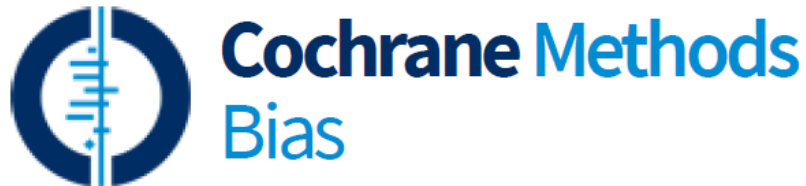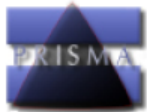

**PRISMA**

TRANSPARENT REPORTING OF SYSTEMATIC REVIEWS AND META-ANALYSES

**Journal of  
Clinical  
Epidemiology**

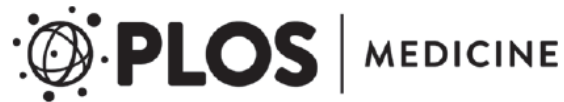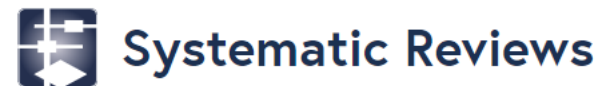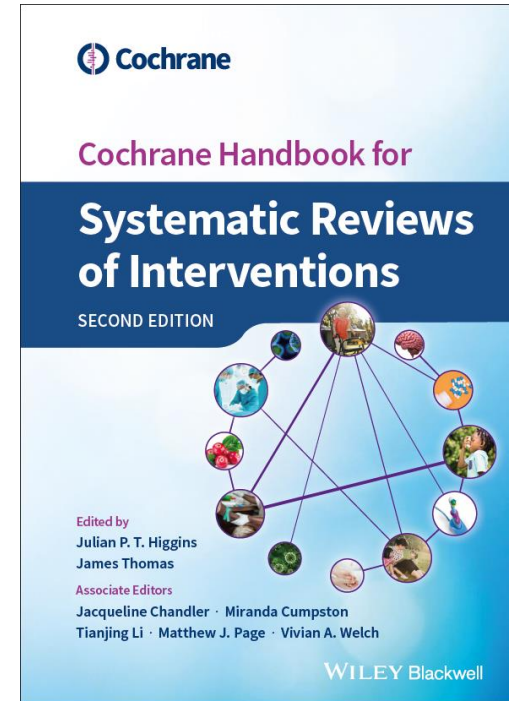

# Outline

Methodological quality of systematic reviews

Reporting quality of systematic reviews

Possible explanations

Summary

# Methodological versus Reporting Quality

- **Methodological quality**
  - How well a systematic review was **designed** and **conducted**
  - e.g. comprehensive literature search
- **Reporting quality:**
  - How well the methods and results were **described** in systematic review reports
  - e.g. clear presentation of meta-analyses

Pussegoda et al. Syst Rev 2017;6:131

# Methodological quality of systematic reviews of health and medical research

RESEARCH

Open Access

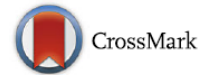

## Systematic review adherence to methodological or reporting quality

Kusala Pussegoda<sup>1</sup>, Lucy Turner<sup>1</sup>, Chantelle Garritty<sup>1,2</sup>, Alain Mayhew<sup>1,3</sup>, Becky Skidmore<sup>1</sup>, Adrienne Stevens<sup>1,2</sup>, Isabelle Boutron<sup>4</sup>, Rafael Sarkis-Onofre<sup>5</sup>, Lise M. Bjerre<sup>3,6,7</sup>, Asbjørn Hróbjartsson<sup>8</sup>, Douglas G. Altman<sup>9</sup> and David Moher<sup>10\*</sup> 

23 studies evaluating 1,794 systematic reviews against AMSTAR

All systematic reviews published before 2017

# Adherence to conduct standards (AMSTAR) in 1,974 SRs

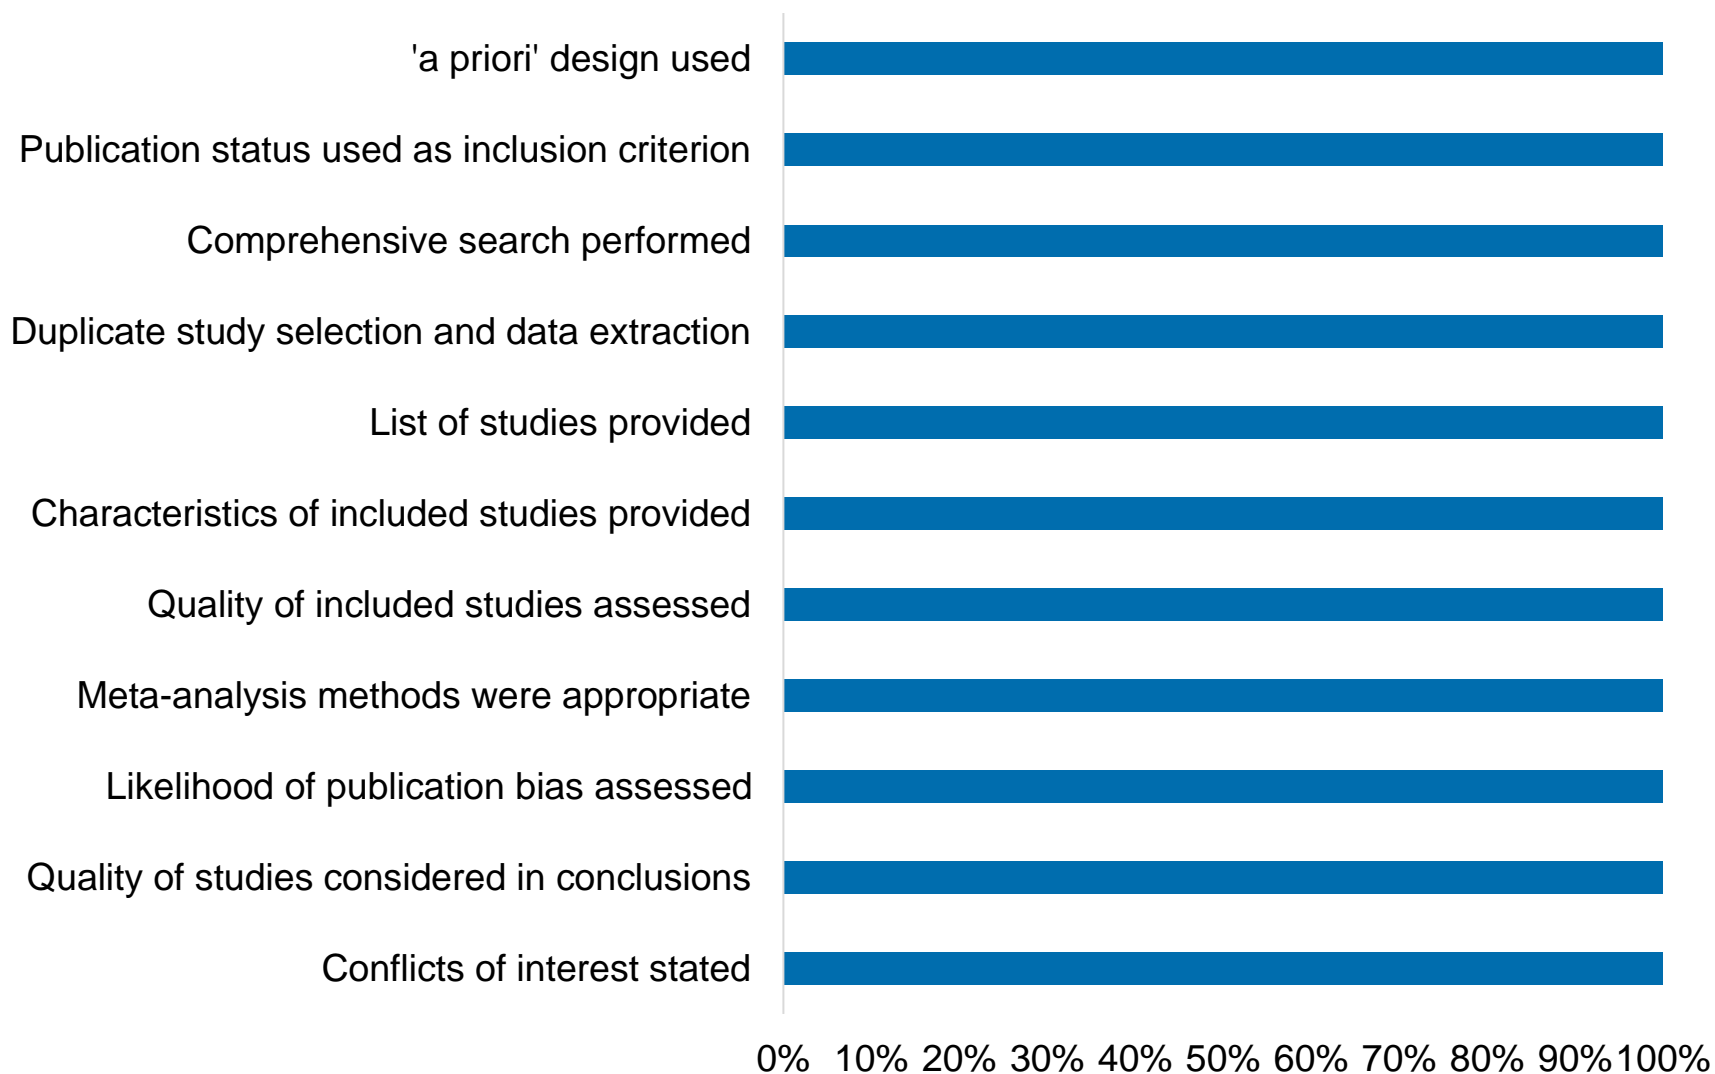

# Adherence to conduct standards (AMSTAR) in 1,974 SRs

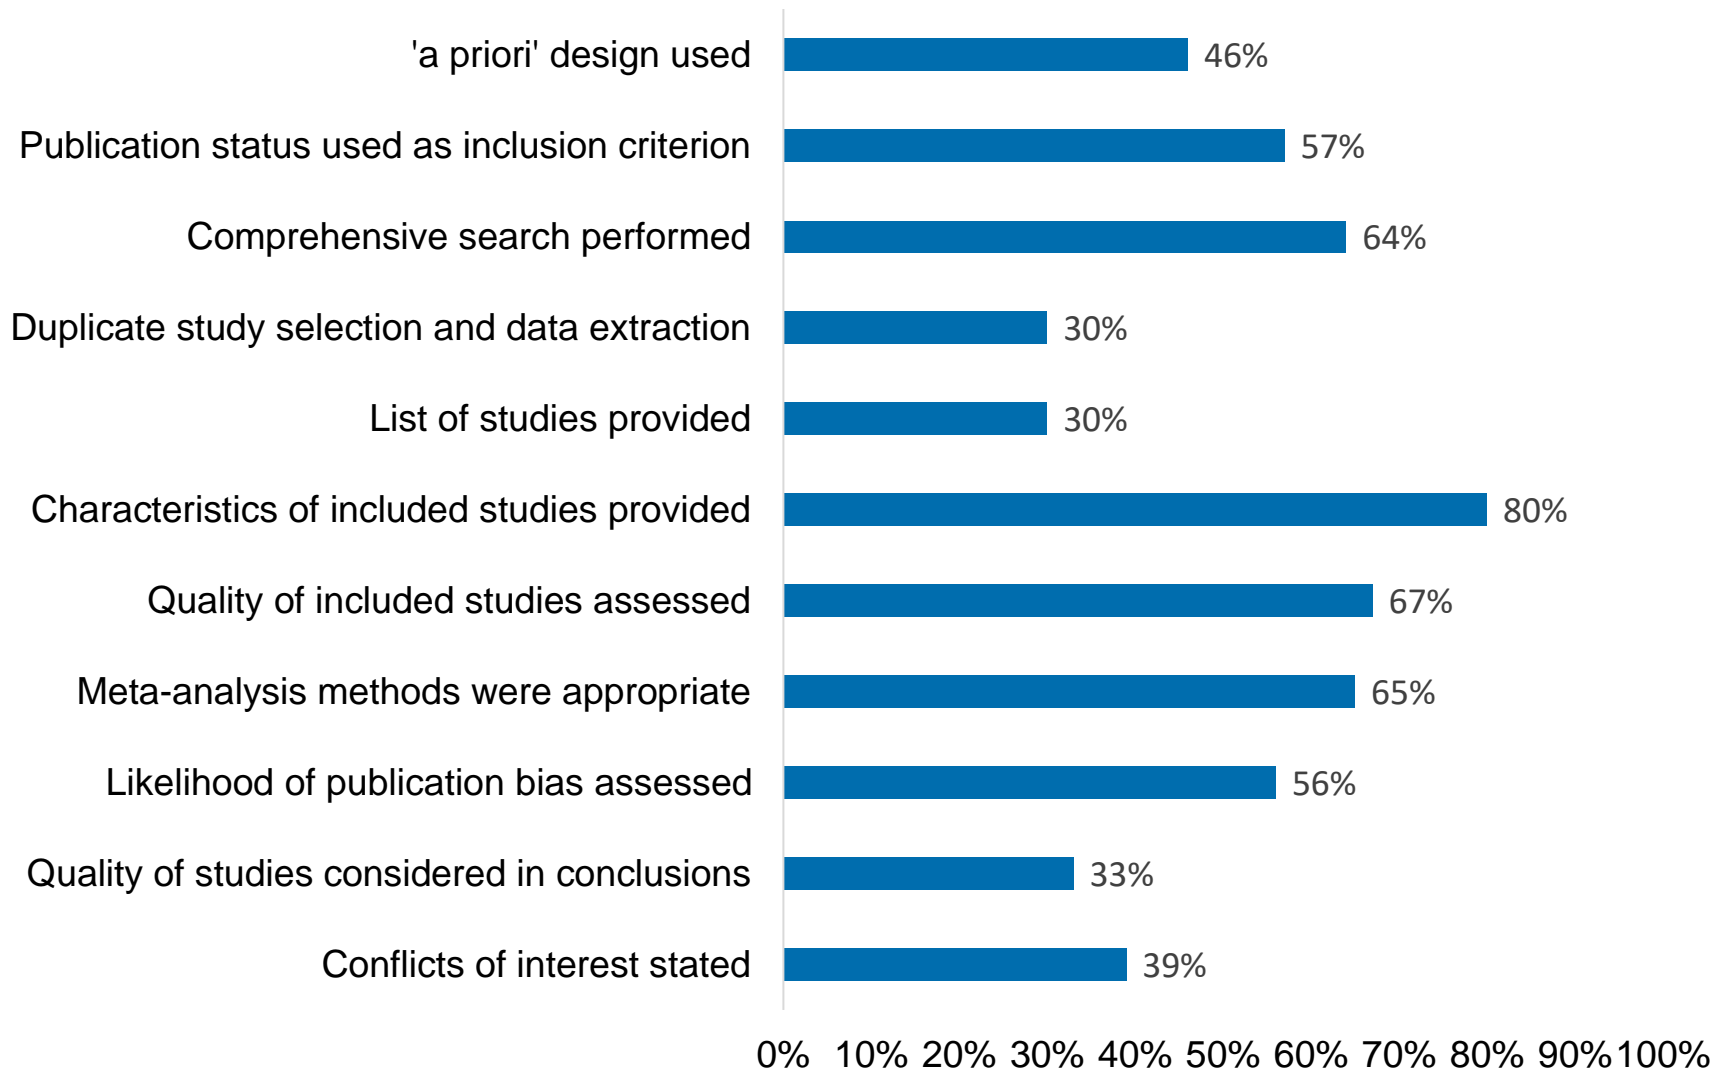



# Reporting quality of systematic reviews of health and medical research

# Cross-sectional study of reporting quality of systematic reviews

RESEARCH ARTICLE

## Epidemiology and Reporting Characteristics of Systematic Reviews of Biomedical Research: A Cross-Sectional Study

Matthew J. Page<sup>1,2</sup>, Larissa Shamseer<sup>3,4</sup>, Douglas G. Altman<sup>5</sup>, Jennifer Tetzlaff<sup>3</sup>, Margaret Sampson<sup>6</sup>, Andrea C. Tricco<sup>7,8</sup>, Ferrán Catalá-López<sup>3,9</sup>, Lun Li<sup>10</sup>, Emma K. Reid<sup>11</sup>, Rafael Sarkis-Onofre<sup>12</sup>, David Moher<sup>3,4\*</sup>

Page et al. PLoS Med 2016;13(5):e1002028

### OBJECTIVE

To investigate the prevalence and reporting characteristics (n=87) of systematic reviews indexed in MEDLINE® in February 2014

682 systematic reviews  
published in a single  
month (Feb 2014)

= >8,000 per year  
= 22 per day

11,749\* systematic reviews indexed in PubMed in 2018

\*PubMed search "Systematic Review" [Publication Type] AND ("2018/01/01" [PDAT] :  
"2018/12/31"[PDAT])

# Improvements in reporting 2004 to 2014 (300 SRs per period)

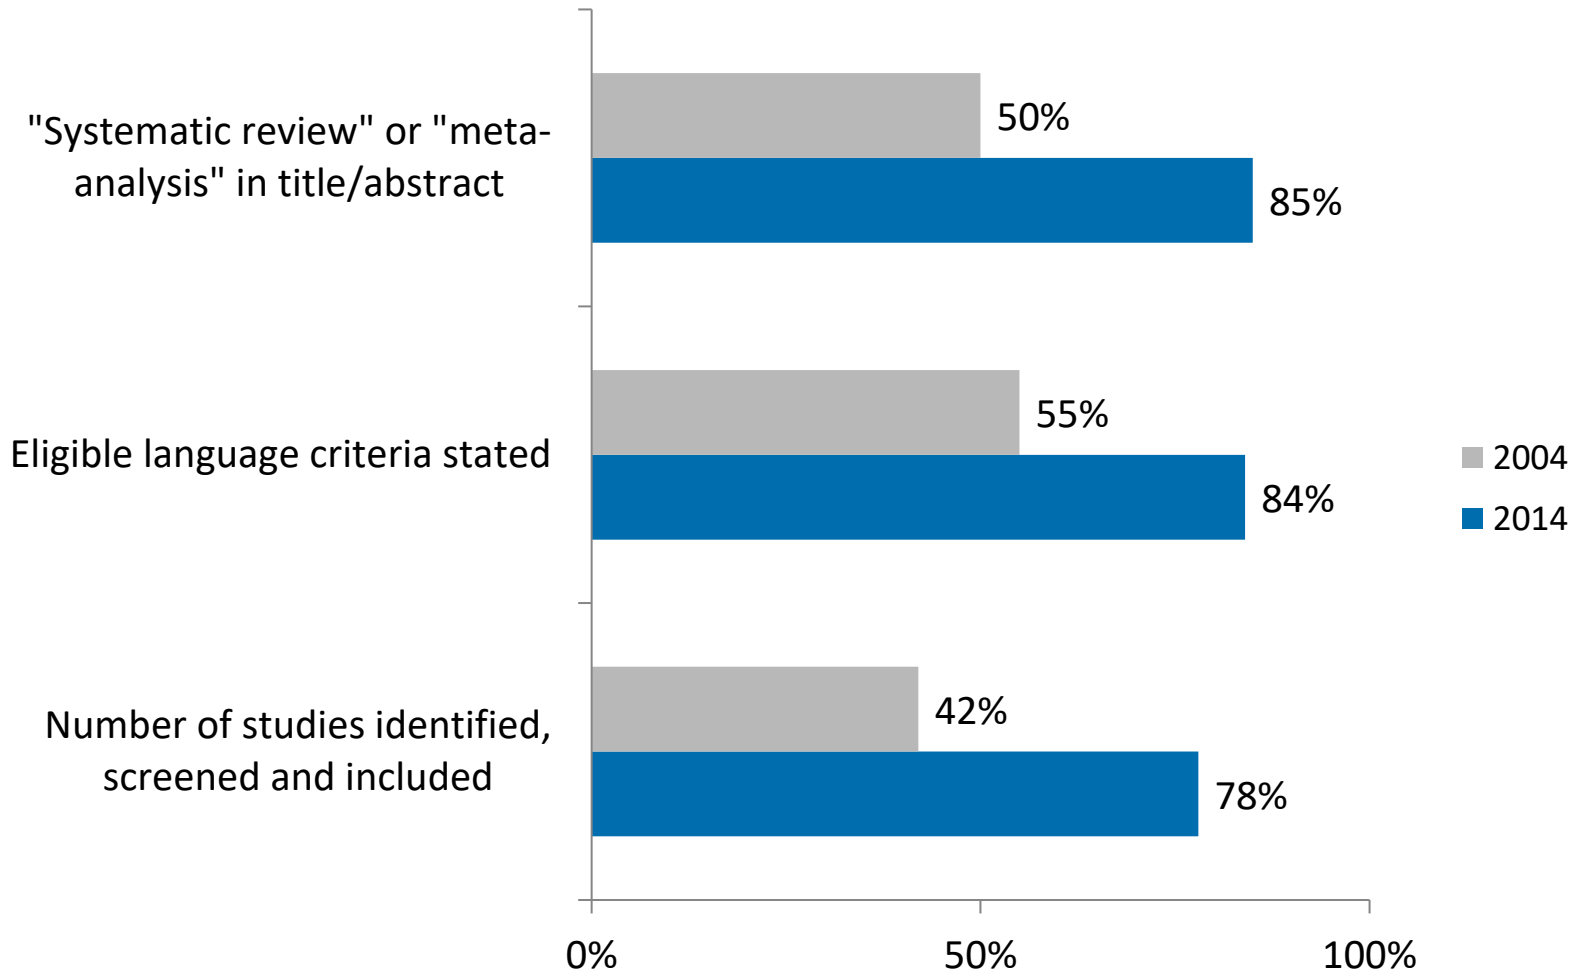

# Areas for improvement in reporting 2004-2014 (300 SRs per period)

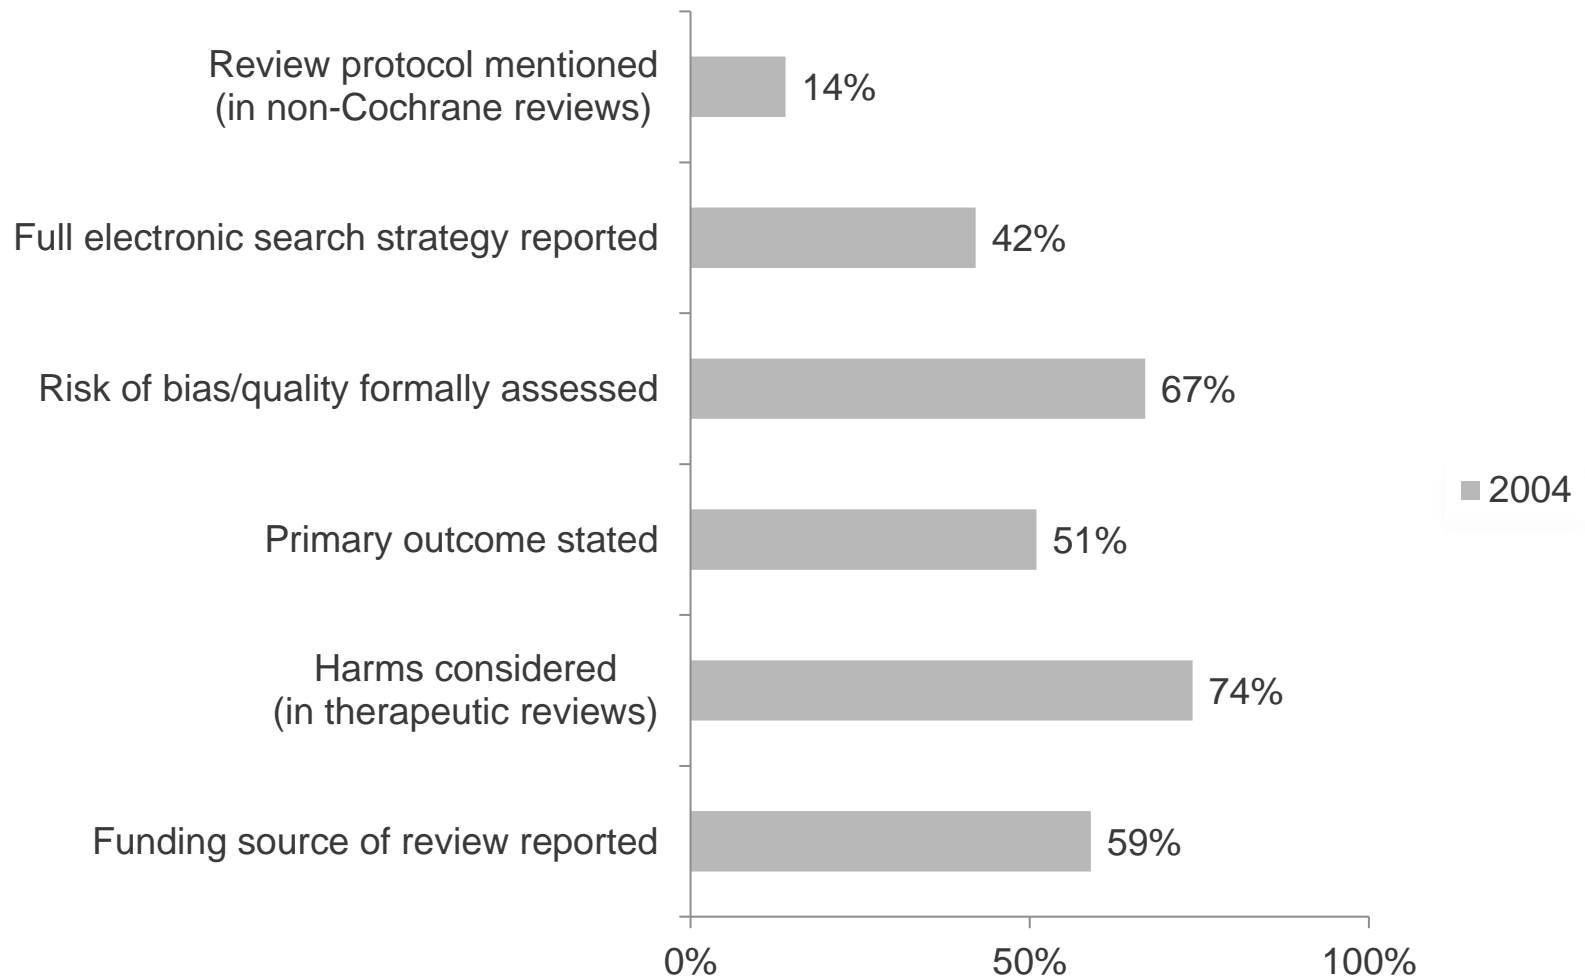

# Areas for improvement in reporting 2004-2014 (300 SRs per period)

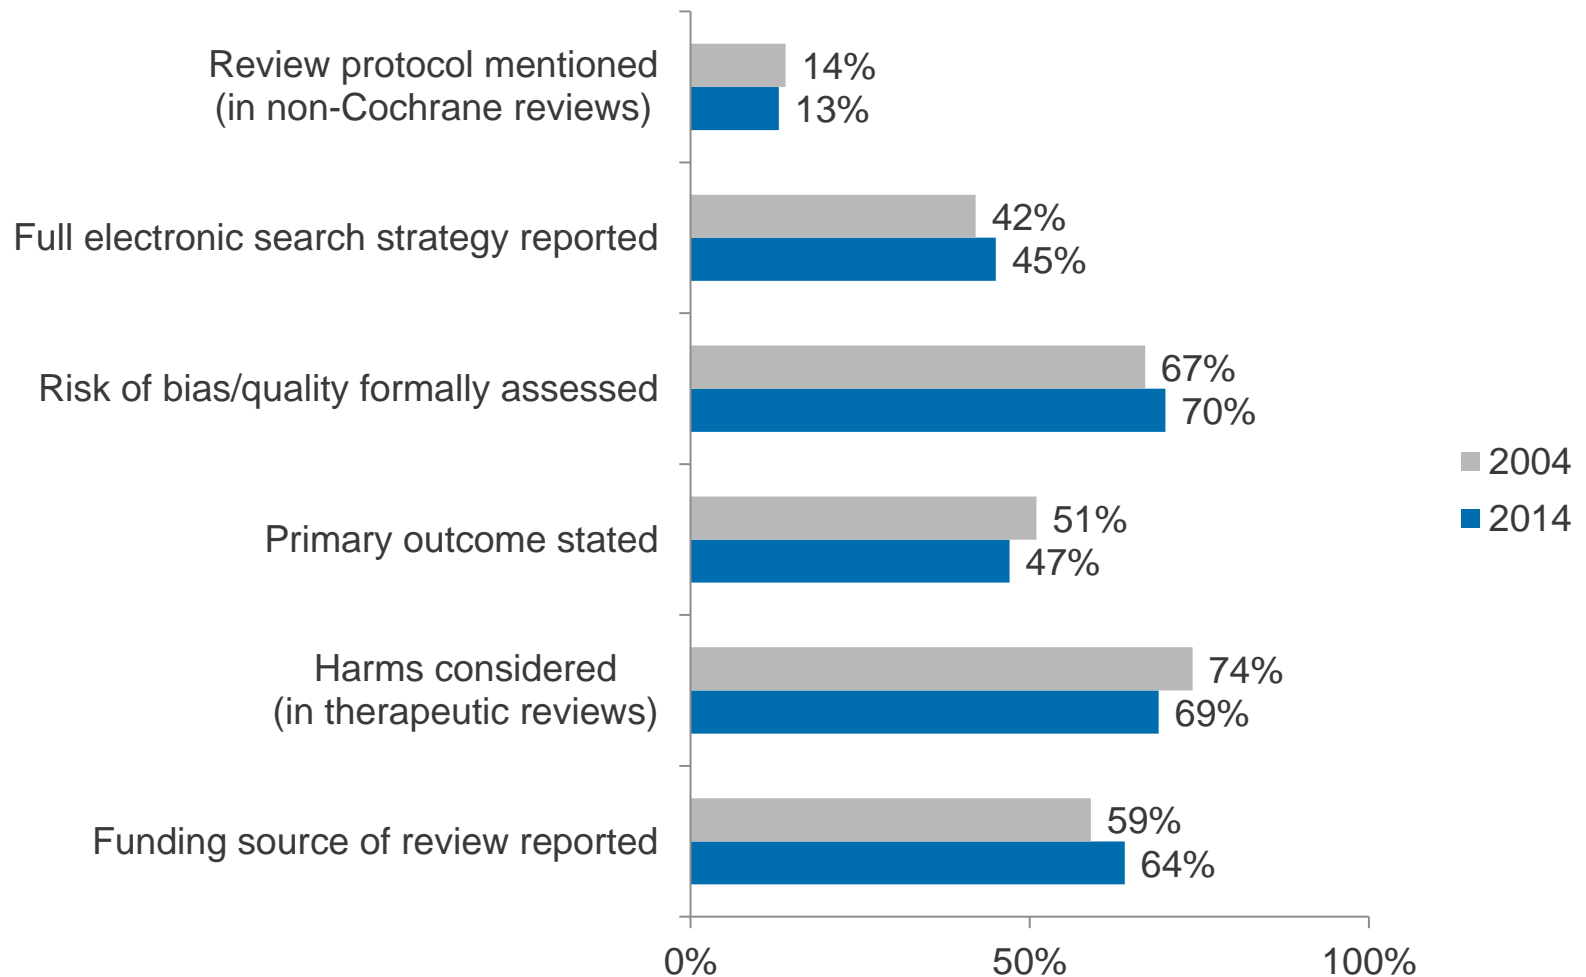

## METHODOLOGY

## Open Access

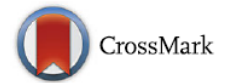

# Evaluations of the uptake and impact of the Preferred Reporting Items for Systematic reviews and Meta-Analyses (PRISMA) Statement and extensions: a scoping review

Matthew J. Page<sup>1\*</sup> and David Moher<sup>2,3</sup>

# Systematic review of studies evaluating adherence to PRISMA

Searched MEDLINE® to July 2017

Included studies evaluating adherence to PRISMA in systematic reviews published 2010 onwards

Pooled number of systematic reviews adhering to each item across all studies

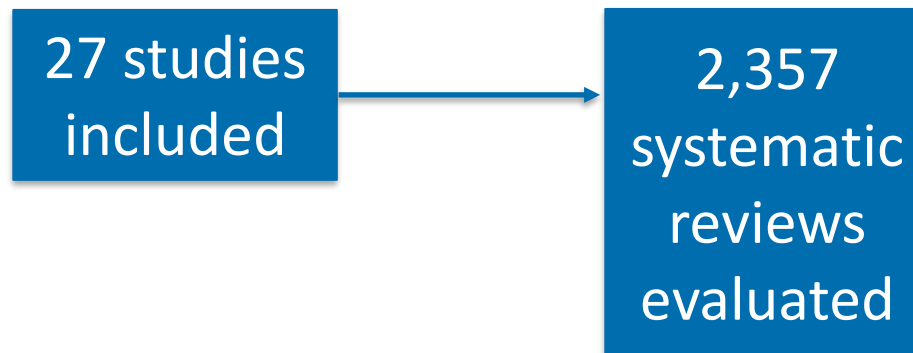



# Adherence to reporting standards (PRISMA) in 2,357 SRs

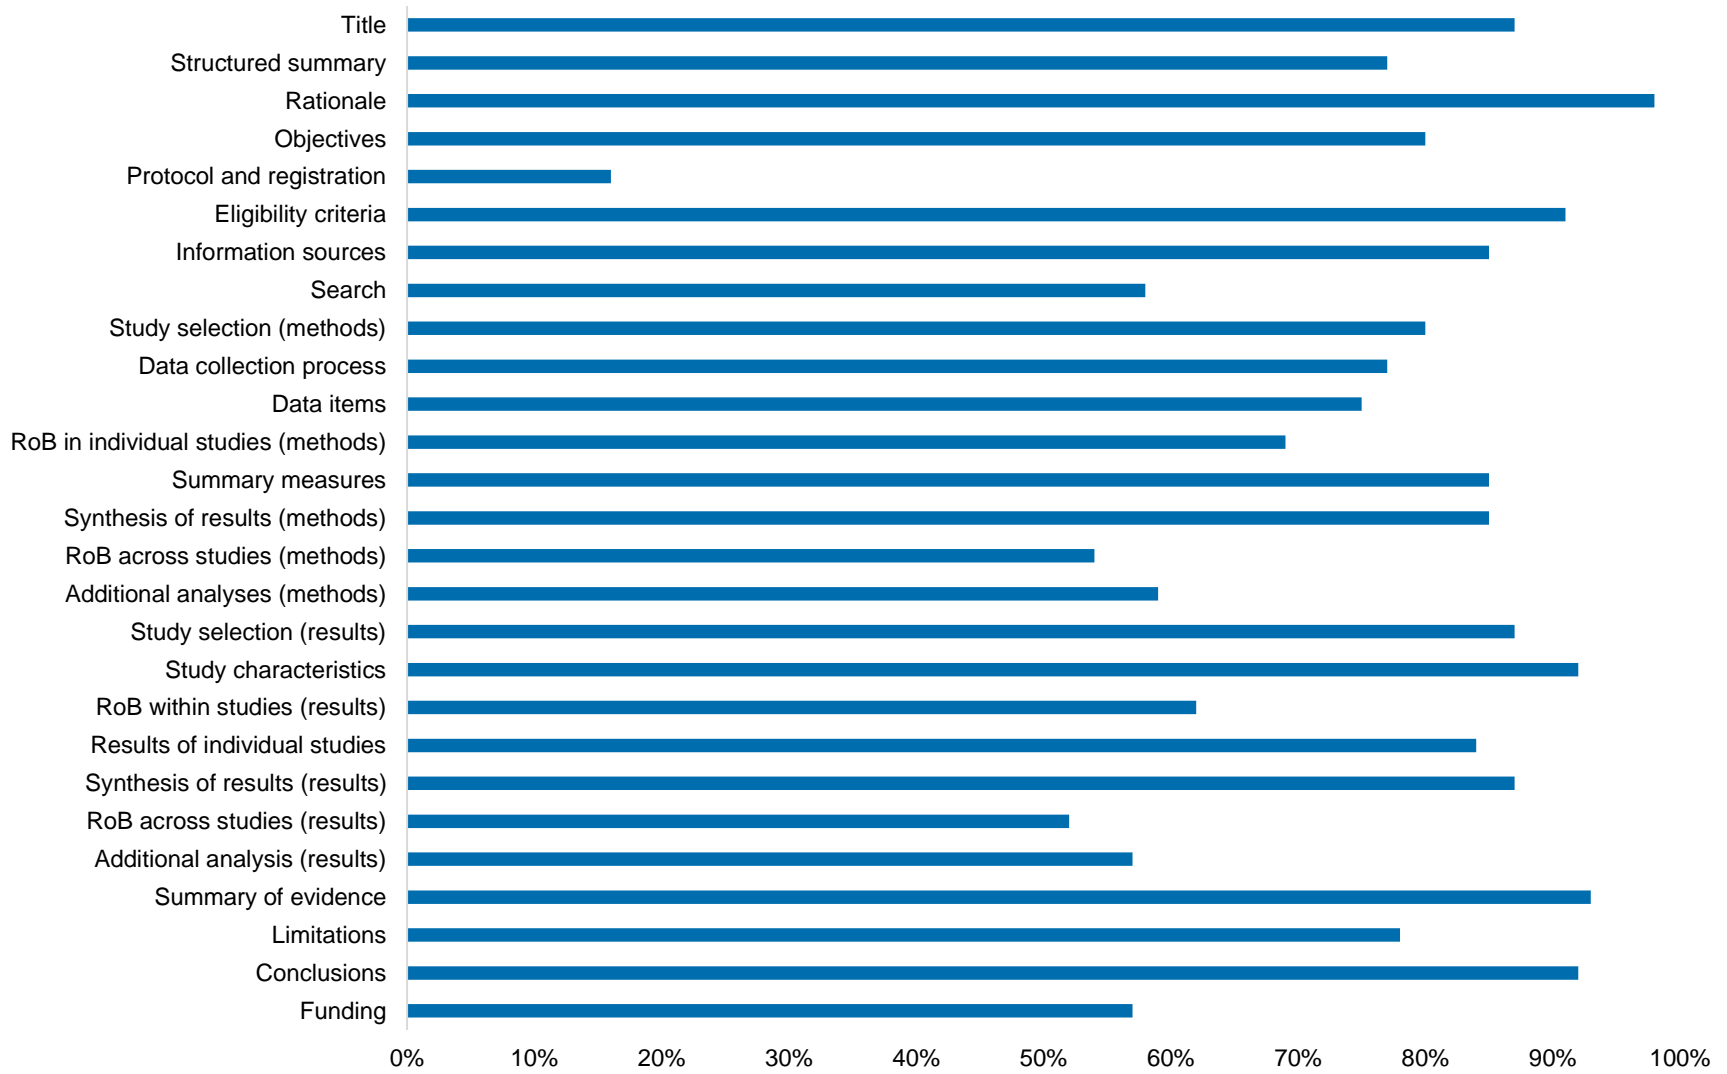

# Adherence to reporting standards (PRISMA) in 2,357 SRs

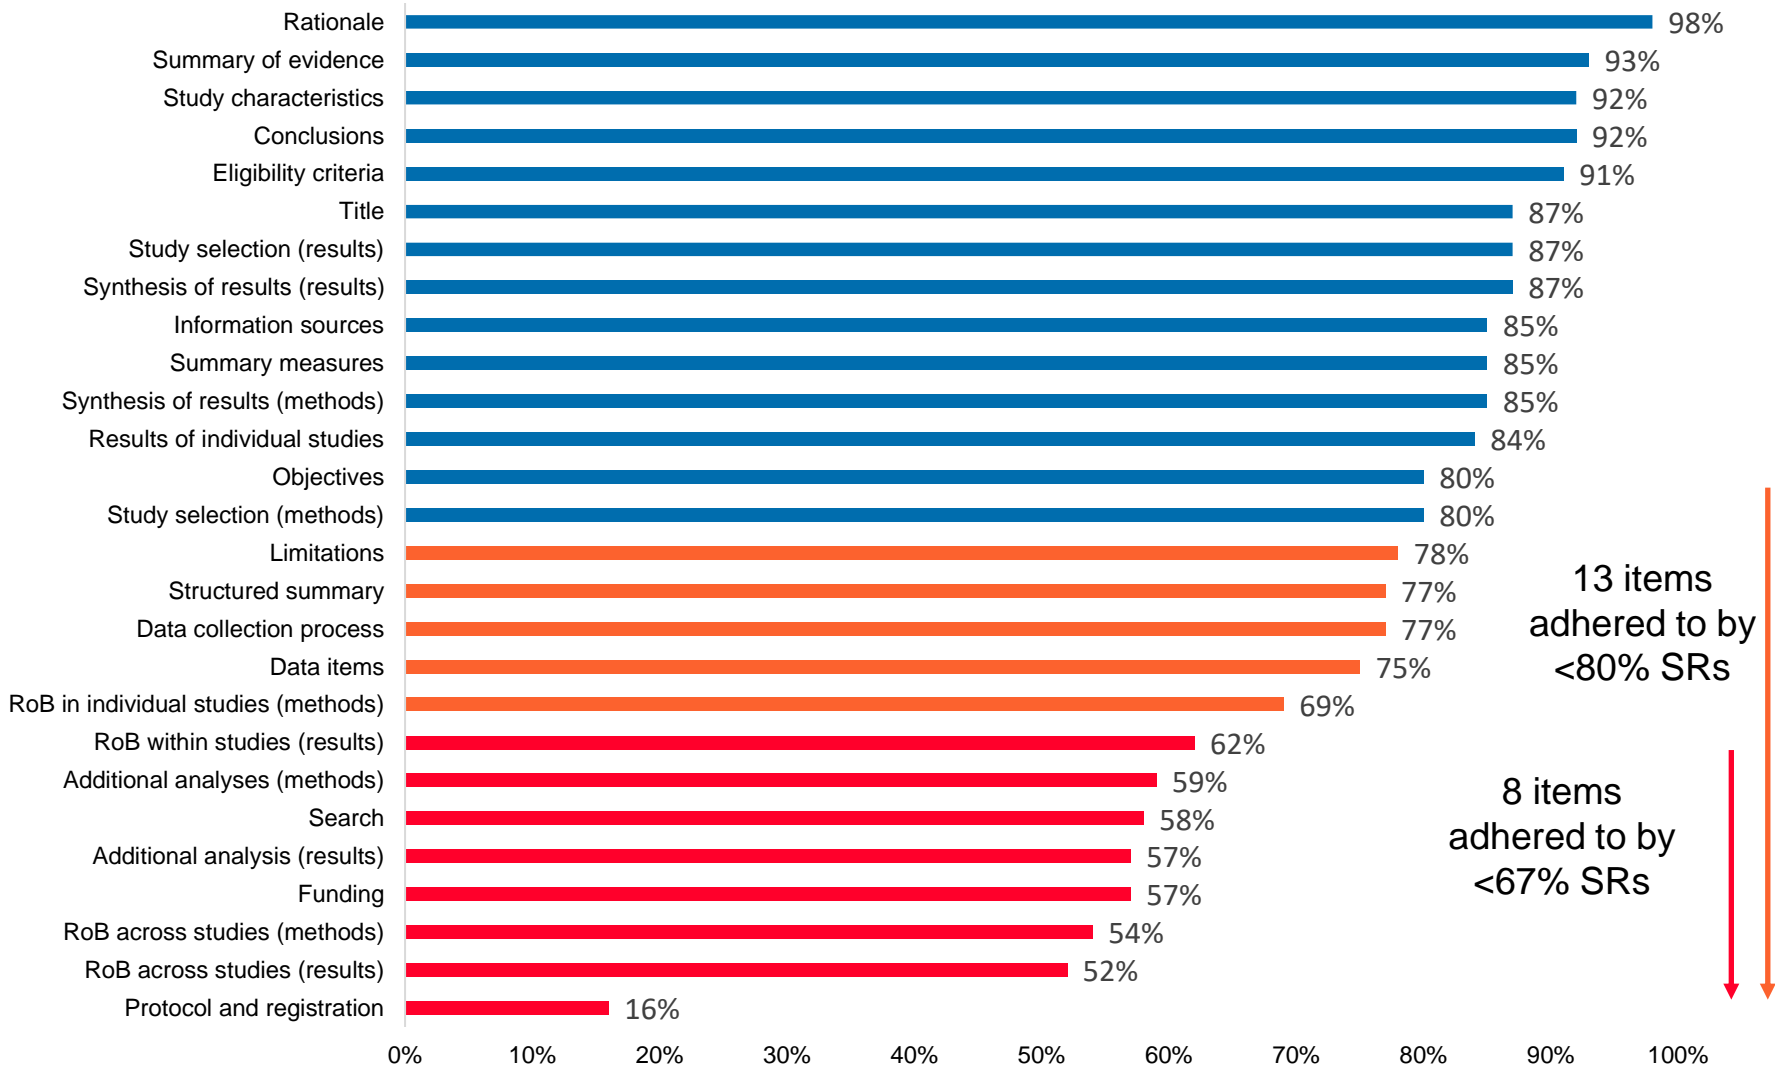

# Adherence to reporting standards (PRISMA) in 2,357 SRs

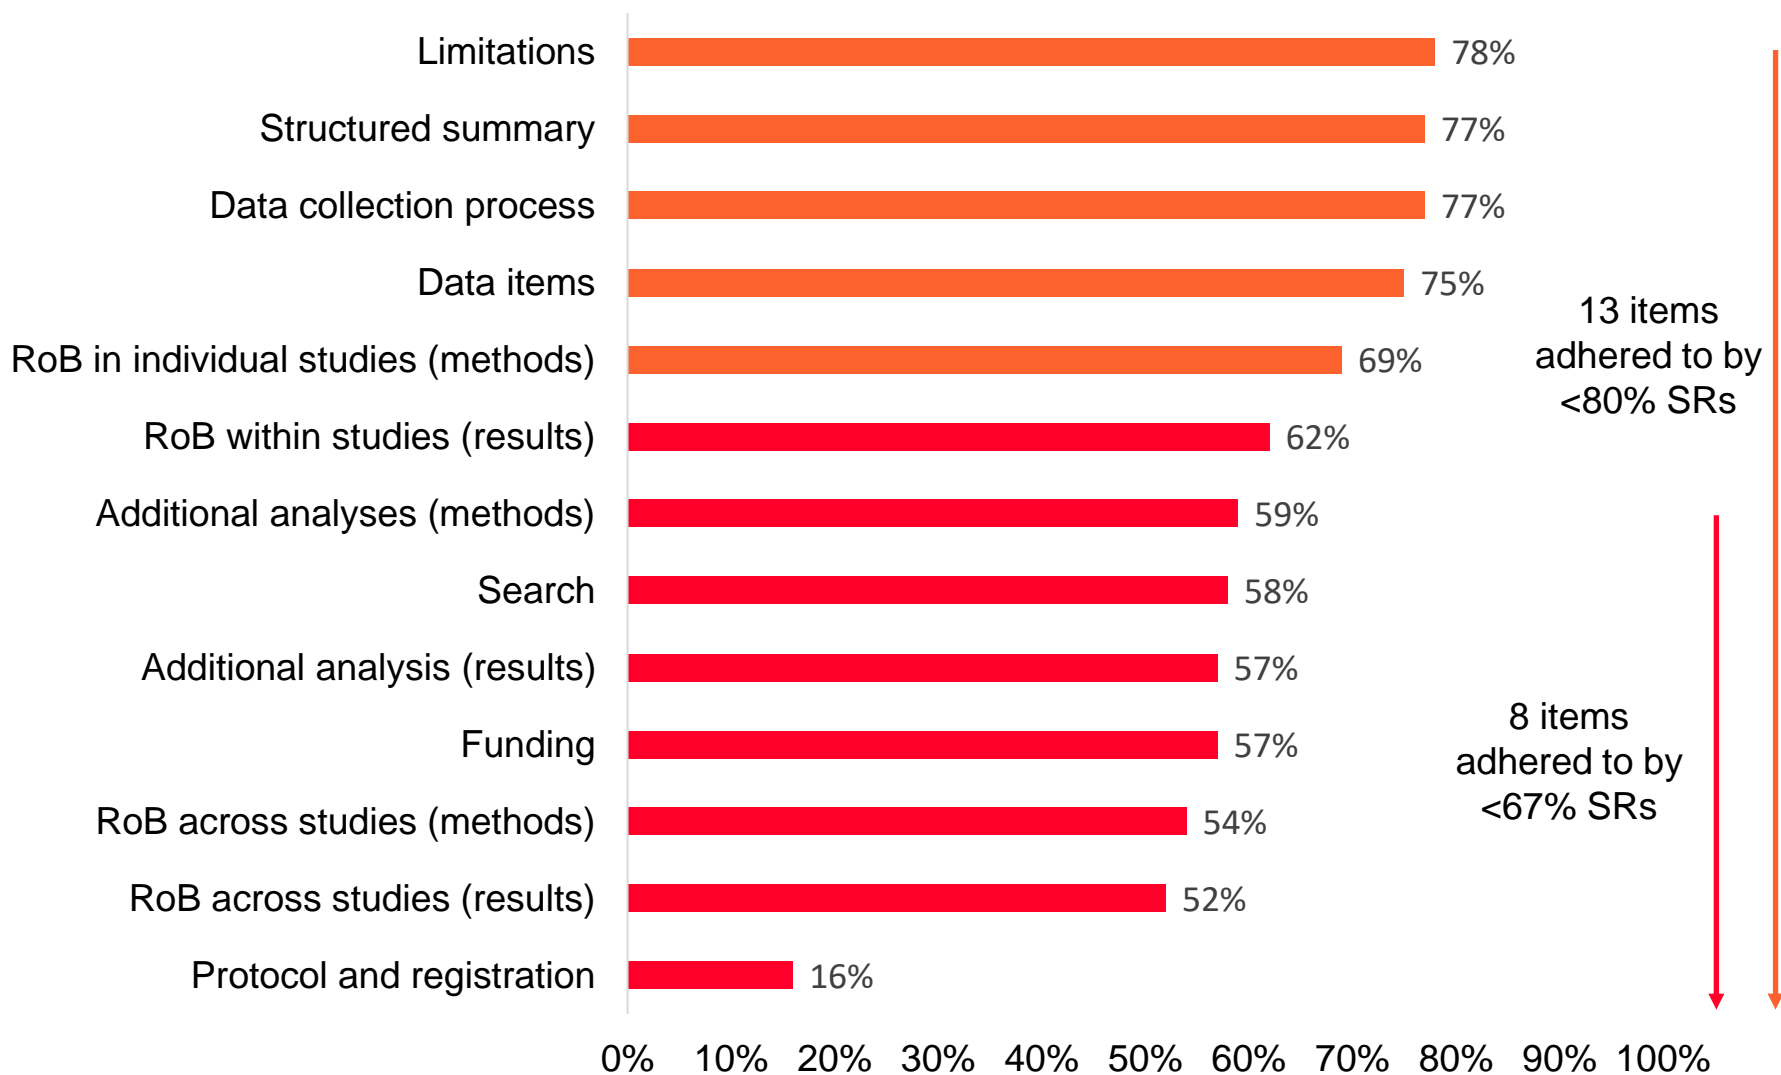

- 154 systematic reviews cited in National Comprehensive Cancer Network guidelines
- 35% presented insufficient info to reproduce all meta-analyses

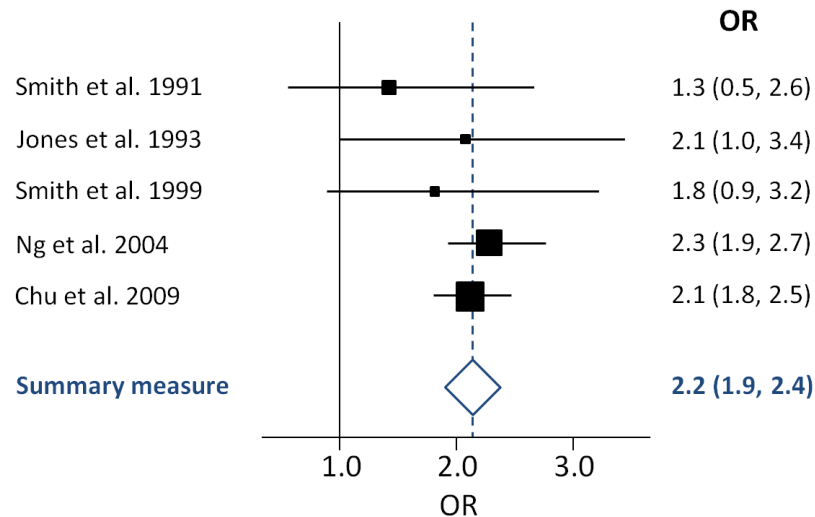

Pre-publication quality at  
*Environment International*

## Assessment of 52 SRs submitted April 2018-April 2019

- 65% show critical issues in defining research objectives
- 60% used search strategies likely to miss key evidence and/or don't provide transparent methods
- 38% at high risk of failing to include all relevant evidence
- 83% used invalid study appraisal instruments, or often none at all
- 62% employ flawed methods for synthesising the findings of included studies

# Possible explanations

# Why are there so many systematic reviews of poor quality?

- Lack of awareness of conduct/reporting standards
- Few strategies available to implement reporting guidelines
- Lack of involvement of librarians, methodologists and statisticians
- (Perceived) lack of suitable methods for all fields
- Lack of understanding of resources required
- “Publish or perish” culture



# Summary

# Summary

Systematic reviews should be able to provide credible evidence for decision making

Evidence that many systematic reviews:

- fail to adhere to existing conduct and reporting guidelines for systematic reviews
- fail to report methods and results in a way that allows users to reproduce them
