# Supplementary material
Source: PubMed Central journal article supplement (PMC9472299)
Supplement: NIHMS1831309-supplement-SM6.pdf [file NIHMS1831309-supplement-SM6.pdf]

Environmental Health Editors Workshop

# Editors Core Competencies

Peter Tugwell

Co-Editor-in Chief, Journal of Clinical  
Epidemiology

Senior Editor, Cochrane MOSS  
Chronic Disease Network

Chair, Campbell International  
Development Review Group

# Editors Core Competencies

- General Core competencies for Journal Editors.
- Core Competencies for Systematic Review Editors

# Editors Core Competencies

- **General Core competencies for Journal Editors.**
- Core Competencies for Systematic Review Editors
- Setting terms of reference and priorities
- Building the right team

CORRESPONDENCE

Open Access

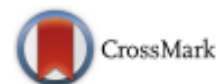

# Core competencies for scientific editors of biomedical journals: consensus statement

David Moher<sup>1,2\*</sup> , James Galipeau<sup>3</sup>, Sabina Alam<sup>4</sup>, Virginia Barbour<sup>5</sup>, Kidist Bartolomeos<sup>6</sup>, Patricia Baskin<sup>7,8</sup>, Sally Bell-Syer<sup>9,10</sup>, Kelly D. Cobey<sup>1,2,11</sup>, Leighton Chan<sup>12</sup>, Jocalyn Clark<sup>13</sup>, Jonathan Deeks<sup>14</sup>, Annette Flanagan<sup>15</sup>, Paul Garner<sup>16</sup>, Anne-Marie Glenny<sup>17</sup>, Trish Groves<sup>18</sup>, Kurinchi Gurusamy<sup>19</sup>, Farrokh Habibzadeh<sup>20,21,22</sup>, Stefanie Jewell-Thomas<sup>23</sup>, Diane Kelsall<sup>24</sup>, José Florencio Lapeña Jr<sup>22,25,26,27</sup>, Harriet MacLehose<sup>28</sup>, Ana Marusic<sup>29,30</sup>, Joanne E. McKenzie<sup>31</sup>, Jay Shah<sup>32,33,34</sup>, Larissa Shamseer<sup>1,2</sup>, Sharon Straus<sup>35</sup>, Peter Tugwell<sup>2,36,37</sup>, Elizabeth Wager<sup>38,39</sup>, Margaret Winker<sup>22</sup> and Getu Zhaori<sup>40</sup>

# General Core competencies for Journal Editors

## Objective

- Develop a minimum set of core competencies for scientific editors of biomedical journals

# General Core competencies for Journal Editors

## Methods

1. Stakeholder Group -Large and Small Journals
2. Scoping Review & Environmental Scan
3. Survey of Editors' Perceptions and Training Needs
4. Modified Delphi Exercise
5. Consensus Meeting
6. Post-Consensus Meeting Activities

# Scope of the core competencies

**Included competencies deemed applicable across the entire spectrum of scientific editors of biomedical journals, however will vary across situations and journal editorial staff**

**:**

# Key competencies for scientific editors

- 14 Key Competencies in 3 Categories:

A. EDITOR QUALITIES AND SKILLS (5)

B. PUBLICATION ETHICS AND RESEARCH INTEGRITY(3)

C. EDITORIAL PRINCIPLES AND PROCESSES (6)

## Elements

- Descriptions of more specific knowledge, skills, and characteristics that contribute to the fulfilment of the core competency
- List is not exhaustive; highlights the most pertinent aspects of that core competency



# Key competencies for scientific editors

- 14 Key Competencies in 3 Categories:

A. EDITOR QUALITIES AND SKILLS (5)

B. PUBLICATION ETHICS AND RESEARCH INTEGRITY(3)

C. EDITORIAL PRINCIPLES AND PROCESSES (6)

## Elements

- Descriptions of more specific knowledge, skills, and characteristics that contribute to the fulfilment of the core competency
- List is not exhaustive; highlights the most pertinent aspects of that core competency

# Key competencies for scientific editors

- 14 Key Competencies in 3 Categories:

A. EDITOR QUALITIES AND SKILLS (5)

B PUBLICATION ETHICS AND RESEARCH  
INTEGRITY(3)

C. EDITORIAL PRINCIPLES AND PROCESSES (6)

•

# Key competencies for scientific editors

## A. EDITOR QUALITIES AND SKILLS

1. Demonstrate experience and broad knowledge of the field(s) covered by the journal
2. Synthesize information and views from a wide range of sources and make informed decisions
3. Practice lifelong learning related to their role as an editor and within their area(s) of expertise
4. Communicate clearly and effectively manage communications and relationships with authors, peer reviewers, other editors, staff (if applicable), readers, journal owners, publishers, and other relevant individuals or groups
5. Act with leadership and integrity and be accountable to authors, peer reviewers, fellow editors, readers, journal owners, publishers, and other relevant individuals and groups

# Key competencies for scientific editors

## A. EDITOR QUALITIES AND SKILLS

1. Demonstrate experience and broad knowledge of the field(s) covered by the journal
2. Synthesize information and views from a wide range of sources and make informed decisions
3. Practice lifelong learning related to their role as an editor and within their area(s) of expertise
4. Communicate clearly and effectively manage communications and relationships with authors, peer reviewers, other editors, staff (if applicable), readers, journal owners, publishers, and other relevant individuals or groups
5. Act with leadership and integrity and be accountable to authors, peer reviewers, fellow editors, readers, journal owners, publishers, and other relevant individuals and groups

# Key competencies for scientific editors

## A. EDITOR QUALITIES AND SKILLS

1. Demonstrate experience and broad knowledge of the field(s) covered by the journal
2. Synthesize information and views from a wide range of sources and make informed decisions
3. Practice lifelong learning related to their role as an editor and within their area(s) of expertise
4. Communicate clearly and effectively manage communications and relationships with authors, peer reviewers, other editors, staff (if applicable), readers, journal owners, publishers, and other relevant individuals or groups
5. Act with leadership and integrity and be accountable to authors, peer reviewers, fellow editors, readers, journal owners, publishers, and other relevant individuals and groups

# Key competencies for scientific editors

## A. EDITOR QUALITIES AND SKILLS

1. Demonstrate experience and broad knowledge of the field(s) covered by the journal
2. Synthesize information and views from a wide range of sources and make informed decisions
3. Practice lifelong learning related to their role as an editor and within their area(s) of expertise
4. Communicate clearly and effectively manage communications and relationships with authors, peer reviewers, other editors, staff (if applicable), readers, journal owners, publishers, and other relevant individuals or groups
5. Act with leadership and integrity and be accountable to authors, peer reviewers, fellow editors, readers, journal owners, publishers, and other relevant individuals and groups

# Key competencies for scientific editors

## A. EDITOR QUALITIES AND SKILLS

1. Demonstrate experience and broad knowledge of the field(s) covered by the journal
2. Synthesize information and views from a wide range of sources and make informed decisions
3. Practice lifelong learning related to their role as an editor and within their area(s) of expertise
4. Communicate clearly and effectively manage communications and relationships with authors, peer reviewers, other editors, staff (if applicable), readers, journal owners, publishers, and other relevant individuals or groups
5. Act with leadership and integrity and be accountable to authors, peer reviewers, fellow editors, readers, journal owners, publishers, and other relevant individuals and groups

# Key competencies for scientific editors

- 14 Key Competencies in 3 Categories:

A. EDITOR QUALITIES AND SKILLS (5)

B PUBLICATION ETHICS AND RESEARCH  
INTEGRITY(3)

C. EDITORIAL PRINCIPLES AND PROCESSES (6)

.



# Key competencies for scientific editors

## B. PUBLICATION ETHICS AND RESEARCH INTEGRITY

6. Demonstrate knowledge related to the integrity of research and publishing and apply best practices in dealing with research or publication misconduct, misbehaviour, and questionable practices
7. Identify and uphold the principles of ethical research involving humans and animals when appraising manuscripts
8. Articulate and apply their responsibilities and rights as a journal editor

# Key competencies for scientific editors

## B. PUBLICATION ETHICS AND RESEARCH INTEGRITY

6. Demonstrate knowledge related to the integrity of research and publishing and apply best practices in dealing with research or publication misconduct, misbehaviour, and questionable practices
7. Identify and uphold the principles of ethical research involving humans and animals when appraising manuscripts
8. Articulate and apply their responsibilities and rights as a journal editor

# Key competencies for scientific editors

## B. PUBLICATION ETHICS AND RESEARCH INTEGRITY

6. Demonstrate knowledge related to the integrity of research and publishing and apply best practices in dealing with research or publication misconduct, misbehaviour, and questionable practices
7. Identify and uphold the principles of ethical research involving humans and animals when appraising manuscripts
8. Articulate and apply their responsibilities and rights as a journal editor

# Key competencies for scientific editors

- 14 Key Competencies in 3 Categories:

A. EDITOR QUALITIES AND SKILLS (5)

B PUBLICATION ETHICS AND RESEARCH  
INTEGRITY(3)

C. EDITORIAL PRINCIPLES AND PROCESSES (6)

# Key competencies for scientific editors

## C. EDITORIAL PRINCIPLES AND PROCESSES

9. Identify and use trustworthy resources
10. Select journal content that reflects the goals and scope of the journal
11. Analyze journal policies, practices, and performance metrics to improve journal performance
12. Evaluate the scientific rigor and integrity of manuscripts and make editorial decisions after consideration of reviewers' and other editors' comments
13. Apply best practices for research and other manuscript presentation when evaluating and requesting revision of manuscripts
14. Manage and assure the integrity of the peer review process

# Key competencies for scientific editors

## C. EDITORIAL PRINCIPLES AND PROCESSES

9. Identify and use trustworthy resources
10. Select journal content that reflects the goals and scope of the journal
11. Analyze journal policies, practices, and performance metrics to improve journal performance
12. Evaluate the scientific rigor and integrity of manuscripts and make editorial decisions after consideration of reviewers' and other editors' comments
13. Apply best practices for research and other manuscript presentation when evaluating and requesting revision of manuscripts
14. Manage and assure the integrity of the peer review process

# Key competencies for scientific editors

## C. EDITORIAL PRINCIPLES AND PROCESSES

9. Identify and use trustworthy resources
10. Select journal content that reflects the goals and scope of the journal
11. Analyze journal policies, practices, and performance metrics to improve journal performance
12. Evaluate the scientific rigor and integrity of manuscripts and make editorial decisions after consideration of reviewers' and other editors' comments
13. Apply best practices for research and other manuscript presentation when evaluating and requesting revision of manuscripts
14. Manage and assure the integrity of the peer review process

# Key competencies for scientific editors

## C. EDITORIAL PRINCIPLES AND PROCESSES

9. Identify and use trustworthy resources
10. Select journal content that reflects the goals and scope of the journal
11. Analyze journal policies, practices, and performance metrics to improve journal performance
12. Evaluate the scientific rigor and integrity of manuscripts and make editorial decisions after consideration of reviewers' and other editors' comments
13. Apply best practices for research and other manuscript presentation when evaluating and requesting revision of manuscripts
14. Manage and assure the integrity of the peer review process



# Key competencies for scientific editors

## C. EDITORIAL PRINCIPLES AND PROCESSES

9. Identify and use trustworthy resources
10. Select journal content that reflects the goals and scope of the journal
11. Analyze journal policies, practices, and performance metrics to improve journal performance
12. Evaluate the scientific rigor and integrity of manuscripts and make editorial decisions after consideration of reviewers' and other editors' comments
13. Apply best practices for research and other manuscript presentation when evaluating and requesting revision of manuscripts
14. Manage and assure the integrity of the peer review process

# Key competencies for scientific editors

## C. EDITORIAL PRINCIPLES AND PROCESSES

9. Identify and use trustworthy resources
10. Select journal content that reflects the goals and scope of the journal
11. Analyze journal policies, practices, and performance metrics to improve journal performance
12. Evaluate the scientific rigor and integrity of manuscripts and make editorial decisions after consideration of reviewers' and other editors' comments
13. Apply best practices for research and other manuscript presentation when evaluating and requesting revision of manuscripts
14. Manage and assure the integrity of the peer review process

# Key competencies for scientific editors

## C. EDITORIAL PRINCIPLES AND PROCESSES

9. Identify and use trustworthy resources
10. Select journal content that reflects the goals and scope of the journal
11. Analyze journal policies, practices, and performance metrics to improve journal performance
12. Evaluate the scientific rigor and integrity of manuscripts and make editorial decisions after consideration of reviewers' and other editors' comments
13. Apply best practices for research and other manuscript presentation when evaluating and requesting revision of manuscripts
14. Manage and assure the integrity of the peer review process

- General Core competencies for all Journal Editors.
- **Core Competencies for Systematic Review Editors**
- Setting terms of reference and priorities
- Building the right team

# Core Competencies for Campbell Collaboration Editors (2017)

Building on :

- The work of the Committee on Publication Ethics (COPE)
- The Cochrane Editorial Excellence Project

# Core Competencies for Campbell Collaboration Editors (2017)

1. Principles and Values (3)
2. Core Competencies (6)
3. Development and Assessment of Core Competencies (6)

# Core Competencies for Campbell Collaboration Editors (2017)

1. Principles and Values (3)
2. Core Competencies (6)
3. Development and Assessment of Core Competencies

Principles for  
establishing  
Campbell  
editorial  
competencies  
(3)

---

1. Editors are primarily responsible for decisions about whether and when a document is ready for publication in the Campbell Library.

---

2. Editors are responsible for the quality of work they approve for publication in the Campbell library.

---

3. Editors provide independent, timely, clearly, comprehensive, consistent and constructive substantive and methodological feedback to authors who are preparing systematic reviews (SR) under the auspices of the Campbell Collaboration.



Principles for  
establishing  
Campbell  
editorial  
competencies  
(3)

---

1. Editors are primarily responsible for decisions about whether and when a document is ready for publication in the Campbell Library.

---

2. Editors are responsible for the quality of work they approve for publication in the Campbell library.

---

3. Editors provide independent, timely, clearly, comprehensive, consistent and constructive substantive and methodological feedback to authors who are preparing systematic reviews (SR) under the auspices of the Campbell Collaboration.

Principles for  
establishing  
Campbell  
editorial  
competencies  
(3)

---

1. Editors are primarily responsible for decisions about whether and when a document is ready for publication in the Campbell Library.

---

2. Editors are responsible for the quality of work they approve for publication in the Campbell library.

---

3. Editors provide independent, timely, clearly, comprehensive, consistent and constructive substantive and methodological feedback to authors who are preparing systematic reviews (SR) under the auspices of the Campbell Collaboration.

# Core Competencies for Campbell Collaboration Editors (2017)

1. Principles and Values (3)

**2. Core Competencies (6)**

3. Development and Assessment of Core Competencies (6)

Core  
competencies  
for Campbell  
Editors  
(6)

Competencies are measurable or observable knowledge, skills, abilities and behaviours (kSABs) critical to successful job performance.

Editors will demonstrate:

1. Knowledge of *publication ethics* and behaviours consistent with these principles.
2. Knowledge and use of Campbell *systematic review methods*.
3. Knowledge of uses of systematic reviews in policy and practice, and ability to help authors formulate relevant and feasible questions for Campbell reviews.

## Core competencies for Campbell Editors

Competencies are measurable or observable knowledge, skills, abilities and behaviours (kSABs) critical to successful job performance.

Editors will demonstrate:

1. Knowledge of *publication ethics* and behaviours consistent with these principles.
2. Knowledge and use of Campbell *systematic review methods*.
3. Knowledge of uses of systematic reviews in policy and practice, and ability to help authors formulate relevant and feasible questions for Campbell reviews.

## Core competencies for Campbell Editors

Competencies are measurable or observable knowledge, skills, abilities and behaviours (kSABs) critical to successful job performance.

Editors will demonstrate:

1. Knowledge of *publication ethics* and behaviours consistent with these principles.
2. Knowledge and use of Campbell *systematic review methods*.
3. Knowledge of uses of systematic reviews in policy and practice, and ability to help authors formulate relevant and feasible questions for Campbell reviews.

Core  
competencies  
for Campbell  
Editors (6)

---

4. Knowledge and use of *good scientific writing practices*

---

5. Knowledge of and behaviours consistent with *international standards for editors*, including sound publication decisions

---

6. Knowledge of and behaviours consistent with *Campbell editor's roles*, including principles of providing effective feedback.

---

Core  
competencies  
for Campbell  
Editors (6)

---

4. Knowledge and use of *good scientific writing practices*

---

5. Knowledge of and behaviours consistent with *international standards for editors*, including sound publication decisions

---

6. Knowledge of and behaviours consistent with *Campbell editor's roles*, including principles of providing effective feedback.

---



Core  
competencies  
for Campbell  
Editors (6)

---

4. Knowledge and use of *good scientific writing practices*

---

5. Knowledge of and behaviours consistent with *international standards for editors*, including sound publication decisions

---

6. Knowledge of and behaviours consistent with *Campbell editor's roles*, including principles of providing effective feedback.

---

# Core Competencies for Campbell Collaboration Editors (2017)

1. Principles and Values (3)
2. Core Competencies (6)
3. Development and Assessment of  
Core Competencies

# Core Competencies for Campbell Collaboration Editors (2017) :Development and Assessment of Core Competencies for Campbell Editors

## A. Systematic review methods

- Resource :Texts; Handbook ; videos
- Actions : Apprentice ; Editors Workshops ; **Actions:** Lead a Cochrane/Campbell review; Advanced courses in statistics and research methods
- Assessment –Duplicate MECIR Checklists and Action Letters

# Core Competencies for Campbell Collaboration Editors (2017) :Development and Assessment of Core Competencies for Campbell Editors

## B. Publication ethics and research integrity

- Resource COPE eLearning modules (<https://publicationethics.org/>)
- Action: Apprentice
- Assessment :Duplicate COPE flow-charts as needed

# Cochrane Resources: Editorial essentials

This collection of resources is aimed at people engaged in Cochrane editorial processes. Whether you are just starting in your role or you already have experience in Cochrane editorial work, this collection will help you find the resources you need.

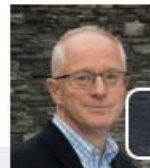

## Editorial Essentials

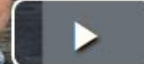

A welcome message by David Tovey  
Editor-in-Chief of the Cochrane Library

Transcript

Listen to the welcome message by  
Cochrane Editor-in-Chief Dr David Tovey

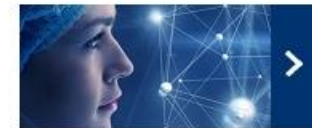

## Cochrane context

Learn about eight Cochrane Review Group Networks and Cochrane Evidence Ecosystem

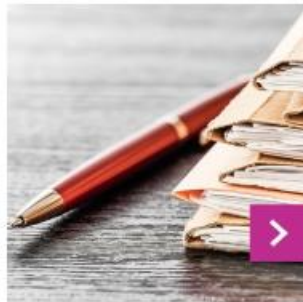

## Editorial policies

Resources and training materials based on Cochrane's [Editorial and Publishing Policy Resource](#).

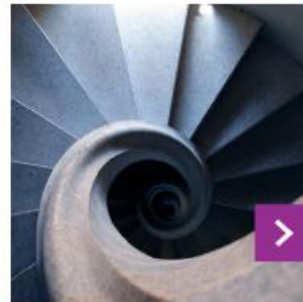

## Editorial processes

Editorial news and support, prioritization, fast track services, resources for specific editorial roles

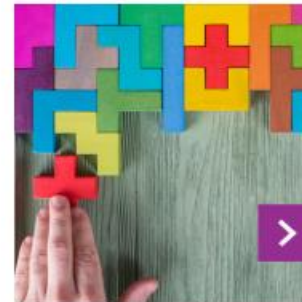

## Methodology

One-stop-shop for learning about or refreshing your knowledge of Cochrane methodology

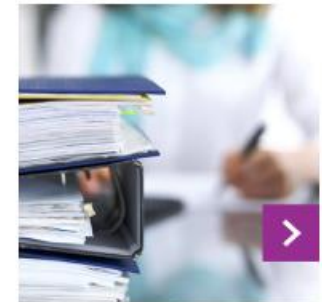

## Key resources

A library of reference materials, guidance and tools
