# Supplementary material
Source: PubMed Central journal article supplement (PMC9472299)
Supplement: NIHMS1831309-supplement-SM65.pdf [file NIHMS1831309-supplement-SM65.pdf]

# Preregistration and Registered Reports for Systematic Reviews

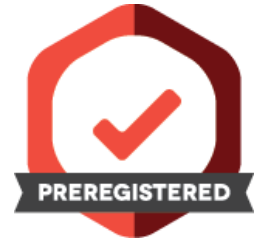

David Mellor  
@EvoMellor  
[david@cos.io](mailto:david@cos.io)

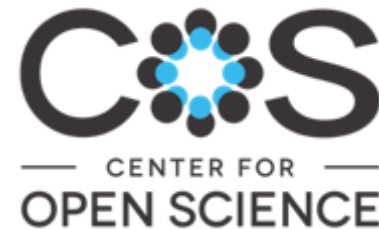

Find this presentation at: <https://osf.io/m28gf>

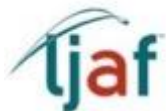

JOHN TEMPLETON  
FOUNDATION

THE WILLIAM AND FLORA  
HEWLETT  
FOUNDATION

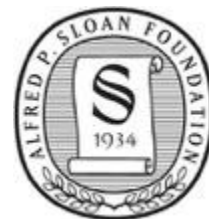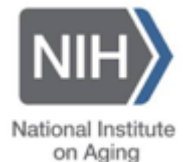

The combination of a strong bias toward statistically significant findings and flexibility in data analysis results in irreproducible research

---

The combination of a strong **bias toward statistically significant** findings and flexibility in data analysis results in irreproducible research

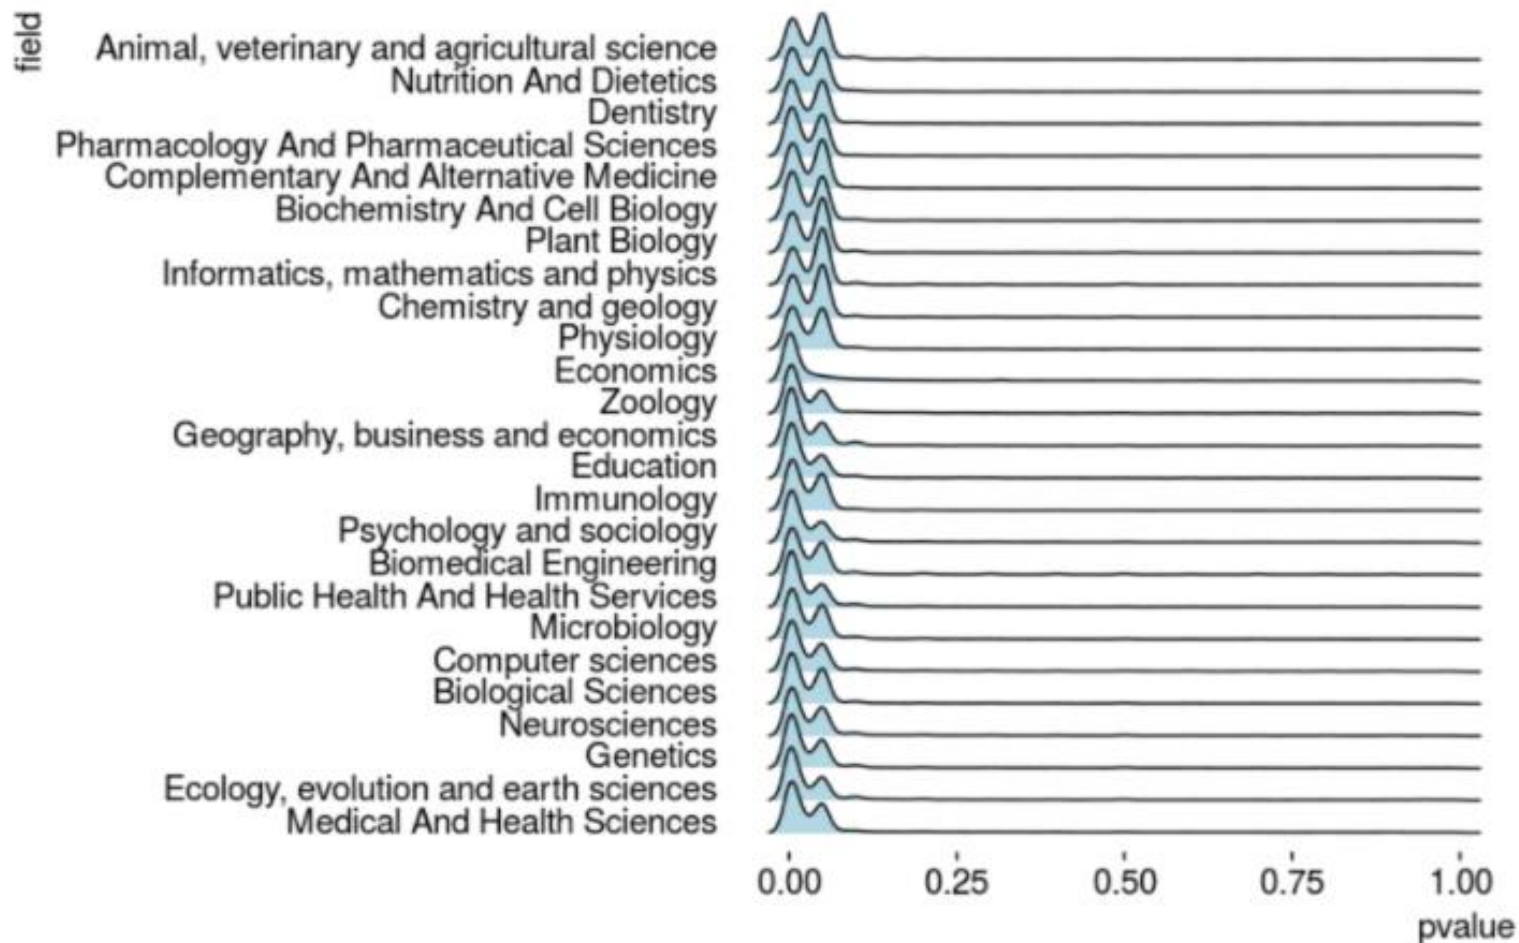

# The combination of a strong bias toward statistically significant findings and flexibility in data analysis results in irreproducible research

## Same Data, Different Conclusions

Twenty-nine research teams were given the same set of soccer data and asked to determine if referees are more likely to give red cards to dark-skinned players. Each team used a different statistical method, and each found a different relationship between skin color and red cards.

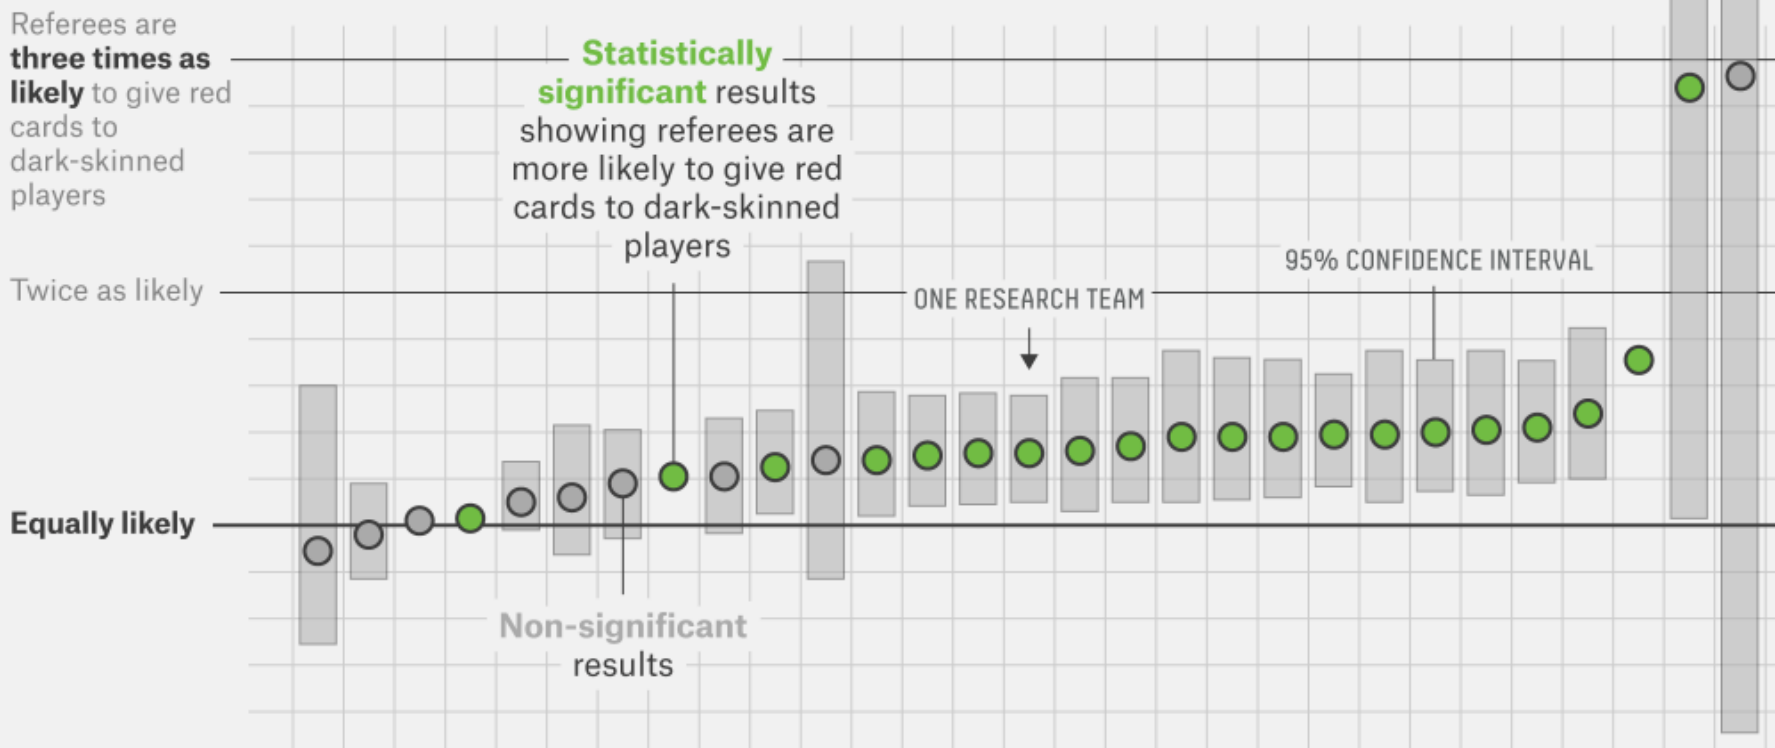

The combination of a strong bias toward statistically significant findings and flexibility in data analysis results in **irreproducible research**

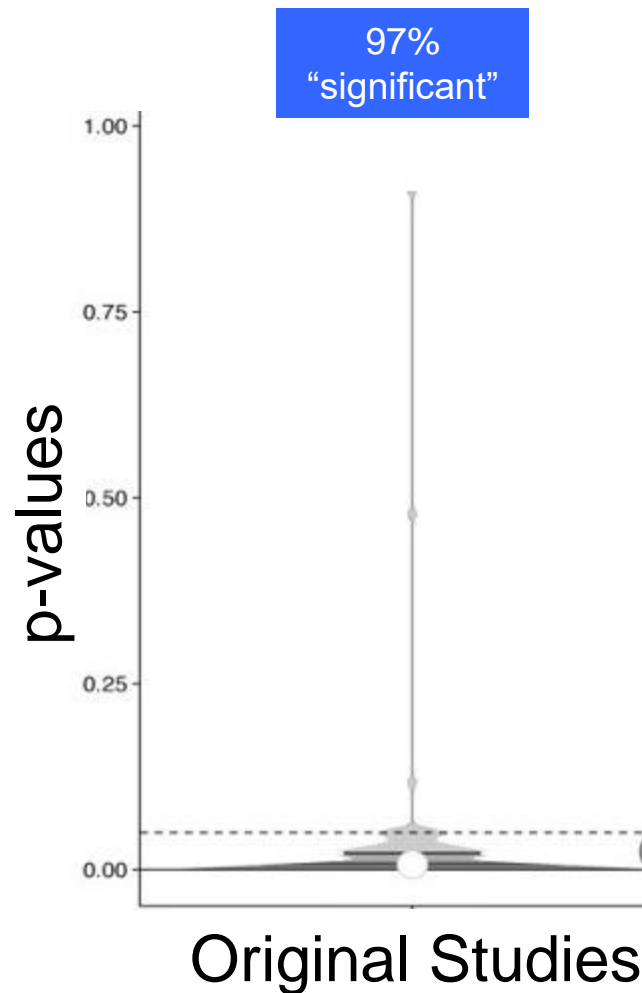

# The combination of a strong bias toward statistically significant findings and flexibility in data analysis results in **irreproducible research**

---

|                                     |                 |
|-------------------------------------|-----------------|
| Many Labs 1                         | 10 of 13 (77%)  |
| Many Labs 2                         | 14 of 28 (50%)  |
| Many Labs 3                         | 3 of 10 (30%)   |
| Reproducibility Project: Psychology | 39 of 100 (39%) |
| Science/Nature: Social Science      | 13 of 21 (62%)  |
| Experimental Economics              | 11 of 18 (61%)  |
| Total                               | 90 of 190 (47%) |

Our mission is to increase  
openness, integrity, and  
reproducibility of research.

Infrastructure

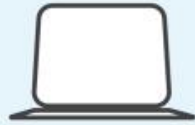

Metascience

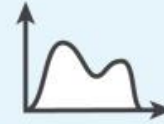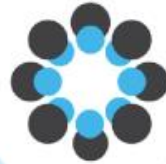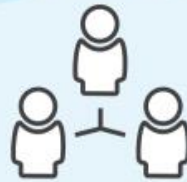

Community

# Open Science Practices

---

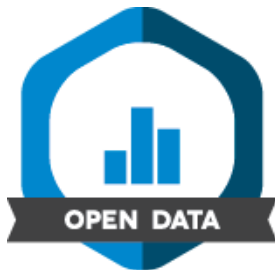

Make available, to the greatest extent permissible by legal and ethical constraints, data underlying reported results.

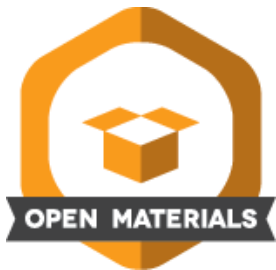

Make available research materials or analytical code for others to use and reuse.

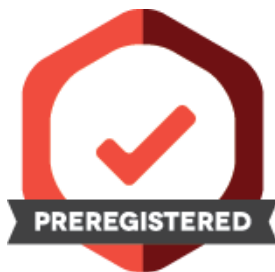

Make a clear distinction between planned hypothesis tests and unplanned exploratory research by using preregistration.



# Preregistration

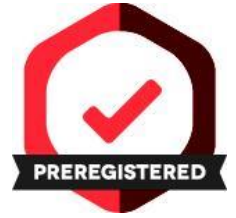

Preregistration increases credibility by specifying in advance how data will be analyzed, thus preventing biased reasoning from affecting data analysis.

[cos.io/prereg](https://cos.io/prereg)

# What is a preregistration?



## A research plan that is

- Time-stamped
- Immutable or read-only
- Created before the study
- Submitted to a public registry

## Study plan:

- Hypothesis
- Data collection procedures
- Manipulated and measured variables

## Analysis plan:

- Statistical model
- Inference criteria

# What problems do preregistration fix?

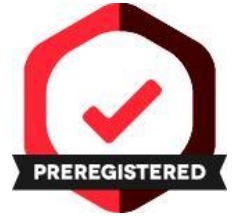

Preregistration makes the distinction between **confirmatory** (hypothesis testing) and **exploratory** (hypothesis generating) research more clear.

# Confirmatory versus exploratory analysis

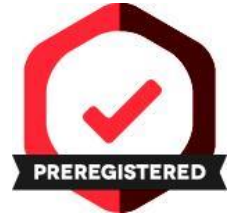

## Context of confirmation

Traditional hypothesis testing

Results held to the highest standards of rigor

Goal is to minimize false positives

P-values interpretable

Preregistration

## Context of discovery

Pushes knowledge into new areas/  
predata-led discovery

Finds unexpected relationships

Goal is to minimize false negatives

P-values meaningless

**Presenting exploratory results as confirmatory increases publishability at the expense of credibility**

# Example workflow #1

(Theory driven with specific prediction)

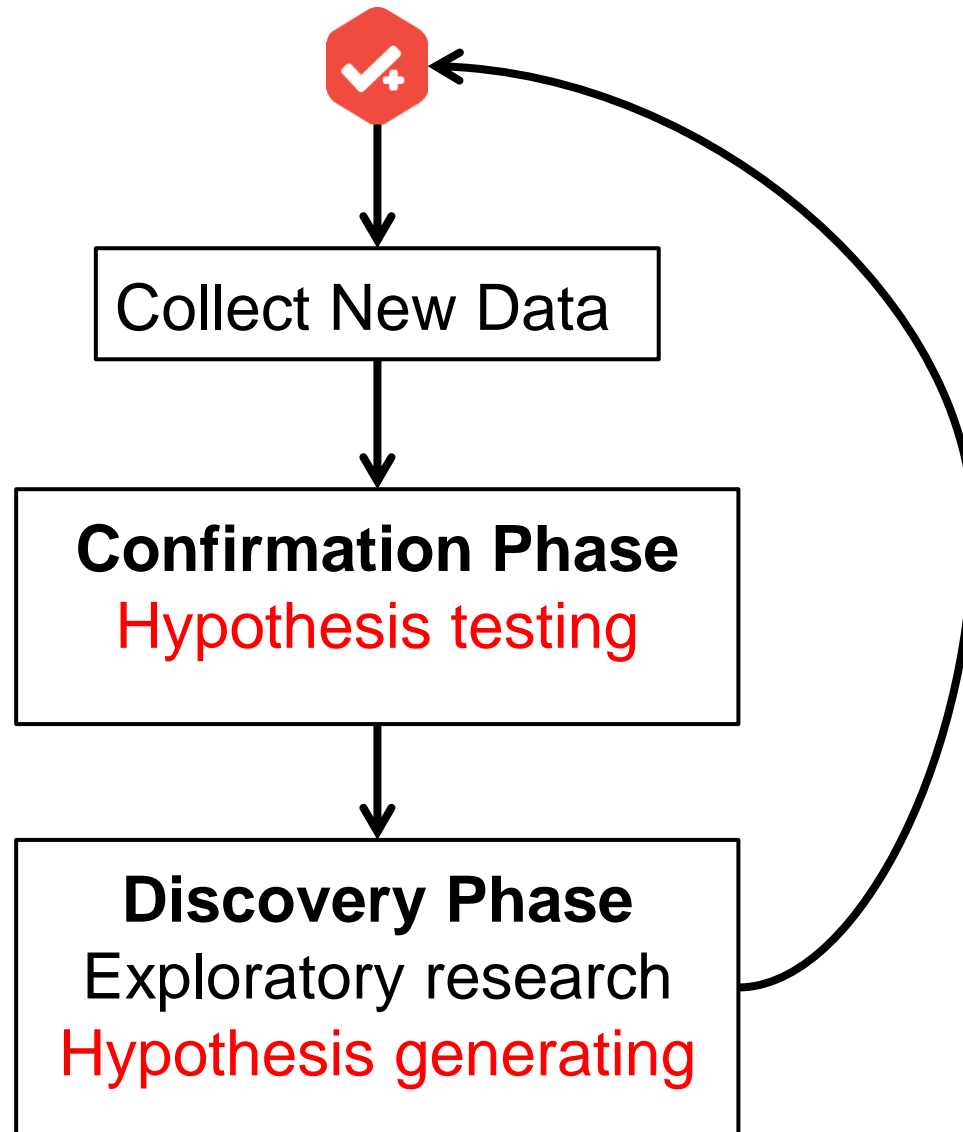

# Example workflow #2

(Few a-priori predictions)

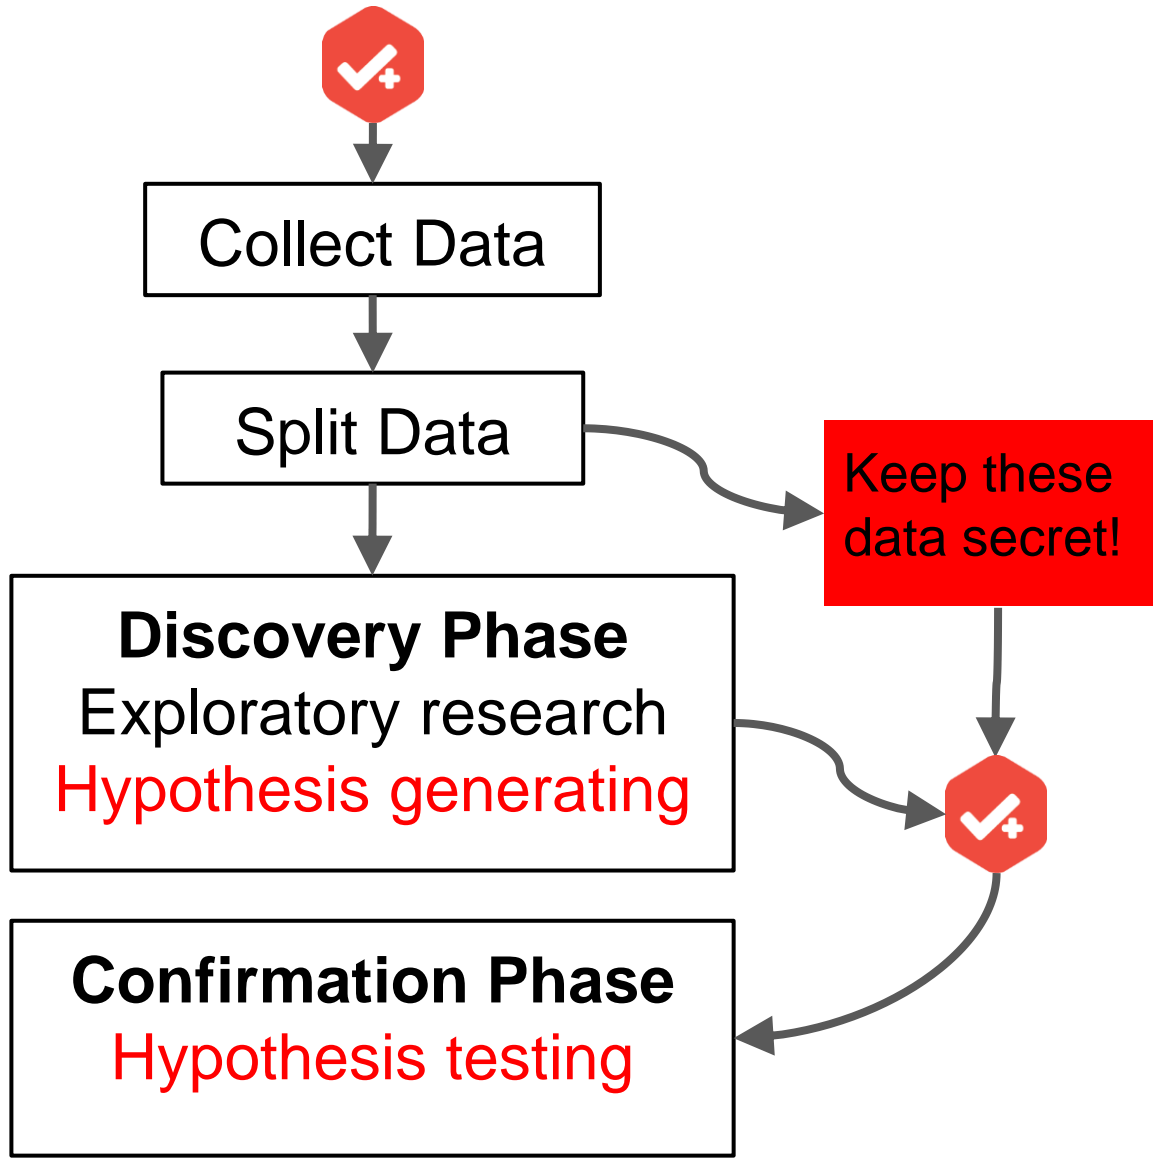

How do you preregister?

(Make it possible and make it easy!)

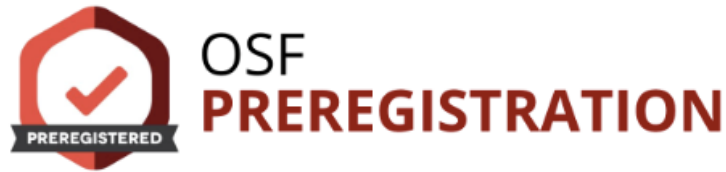

Improve your research with [preregistration](#). By writing out specific details such as data collection methods, analysis plans, and rules for data exclusion, you can make important decisions early on and have a clear record of these choices. This can help reduce biases that occur once the data are in front of you.

Use [OSF Registries](#) to discover previously registered work.

Start a new preregistration

Continue working on an existing draft  
preregistration

Preregister a project you already have on  
OSF



## Edit draft registration

## Study Information

Sampling Plan

Variables

Design Plan

Analysis Plan

Scripts

Other

**Title** (required)

Provide the working title of your study. It is helpful if this is the same title that you submit for publication of your final manuscript, but it is not a requirement.

[Show Example](#)

Effect of X on Y

**Authors** (required)

The author who submits the preregistration is the recipient of the award money and must also be an author of the published manuscript. Additional authors may be added or removed at any time.

[Show Example](#)

David Mellor

Add +

**Research Questions** (required)

Please list each research question included in this study.

[Show Example](#)

Does increasing X change Y?

**Hypotheses** (required)

For each of the research questions listed in the previous section, provide one or multiple specific and testable hypotheses. Please state if the hypotheses are directional or non-directional. If directional, state the direction. A predicted effect is also appropriate here.

[Show Example](#)

If we increase X by 10%, Y will decrease by 30%

This registration is a frozen, non-editable version of [this project](#)

## Register

### Study Information

Title

Authors

Research Questions

Hypotheses

### Study Information

Title

*Provide the working title of your study. It is helpful if this is the same title that you submit for publication of your final manuscript, but it is not a requirement.*

Word Recognition and Cognition

### Sampling Plan

Existing Data

Explanation

Data collection procedures

Sample size

Sample size rationale

Stopping rule

Authors

*The author who submits the preregistration is the recipient of the award money and must also be an author of the published manuscript. Additional authors may be added or removed at any time.*

Alia Lancaster, L. Robert Slevc

Research Questions

# Writing up preregistered work



1. Include a link to your preregistration
2. Report the results of ALL preregistered analyses
3. Label exploratory results
4. Include “Transparent Changes” doc

# FAQ: Does preregistration work?



## Reported Tests (122)

Median  $p$ -value = .02

Median effect size ( $d$ ) = .29

%  $p < .05$  = 63%

## Unreported Tests (147)

Median  $p$ -value = .35

Median effect size ( $d$ ) = .13

%  $p < .05$  = 23%

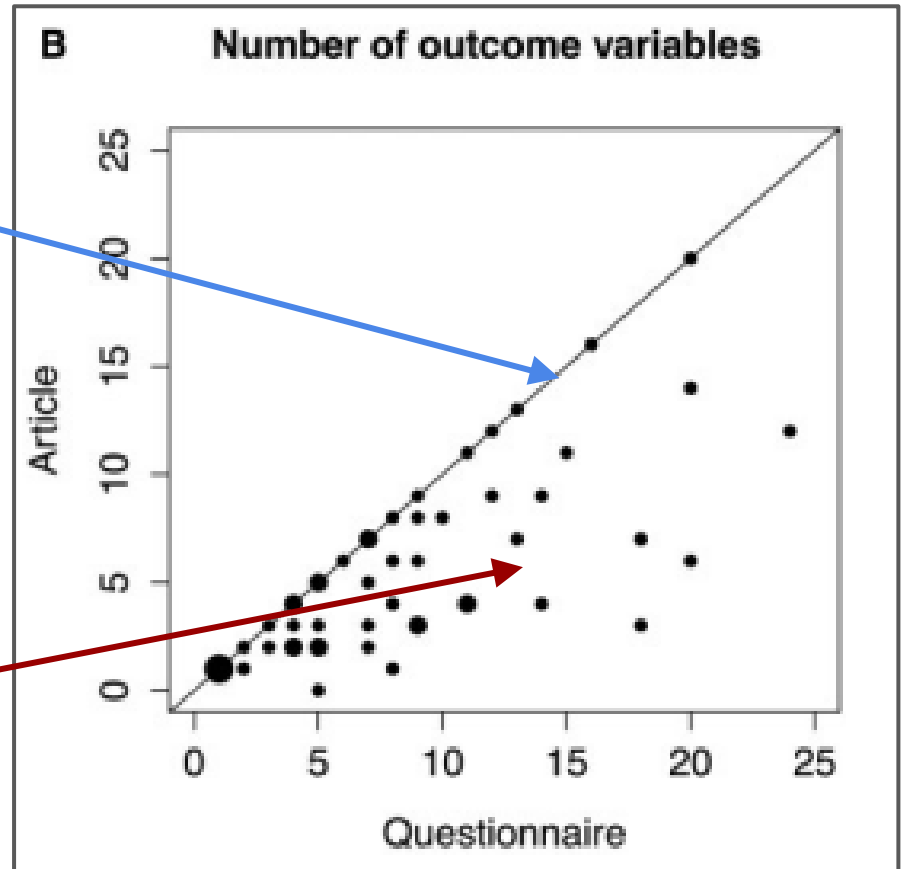

# Number of OSF Registrations

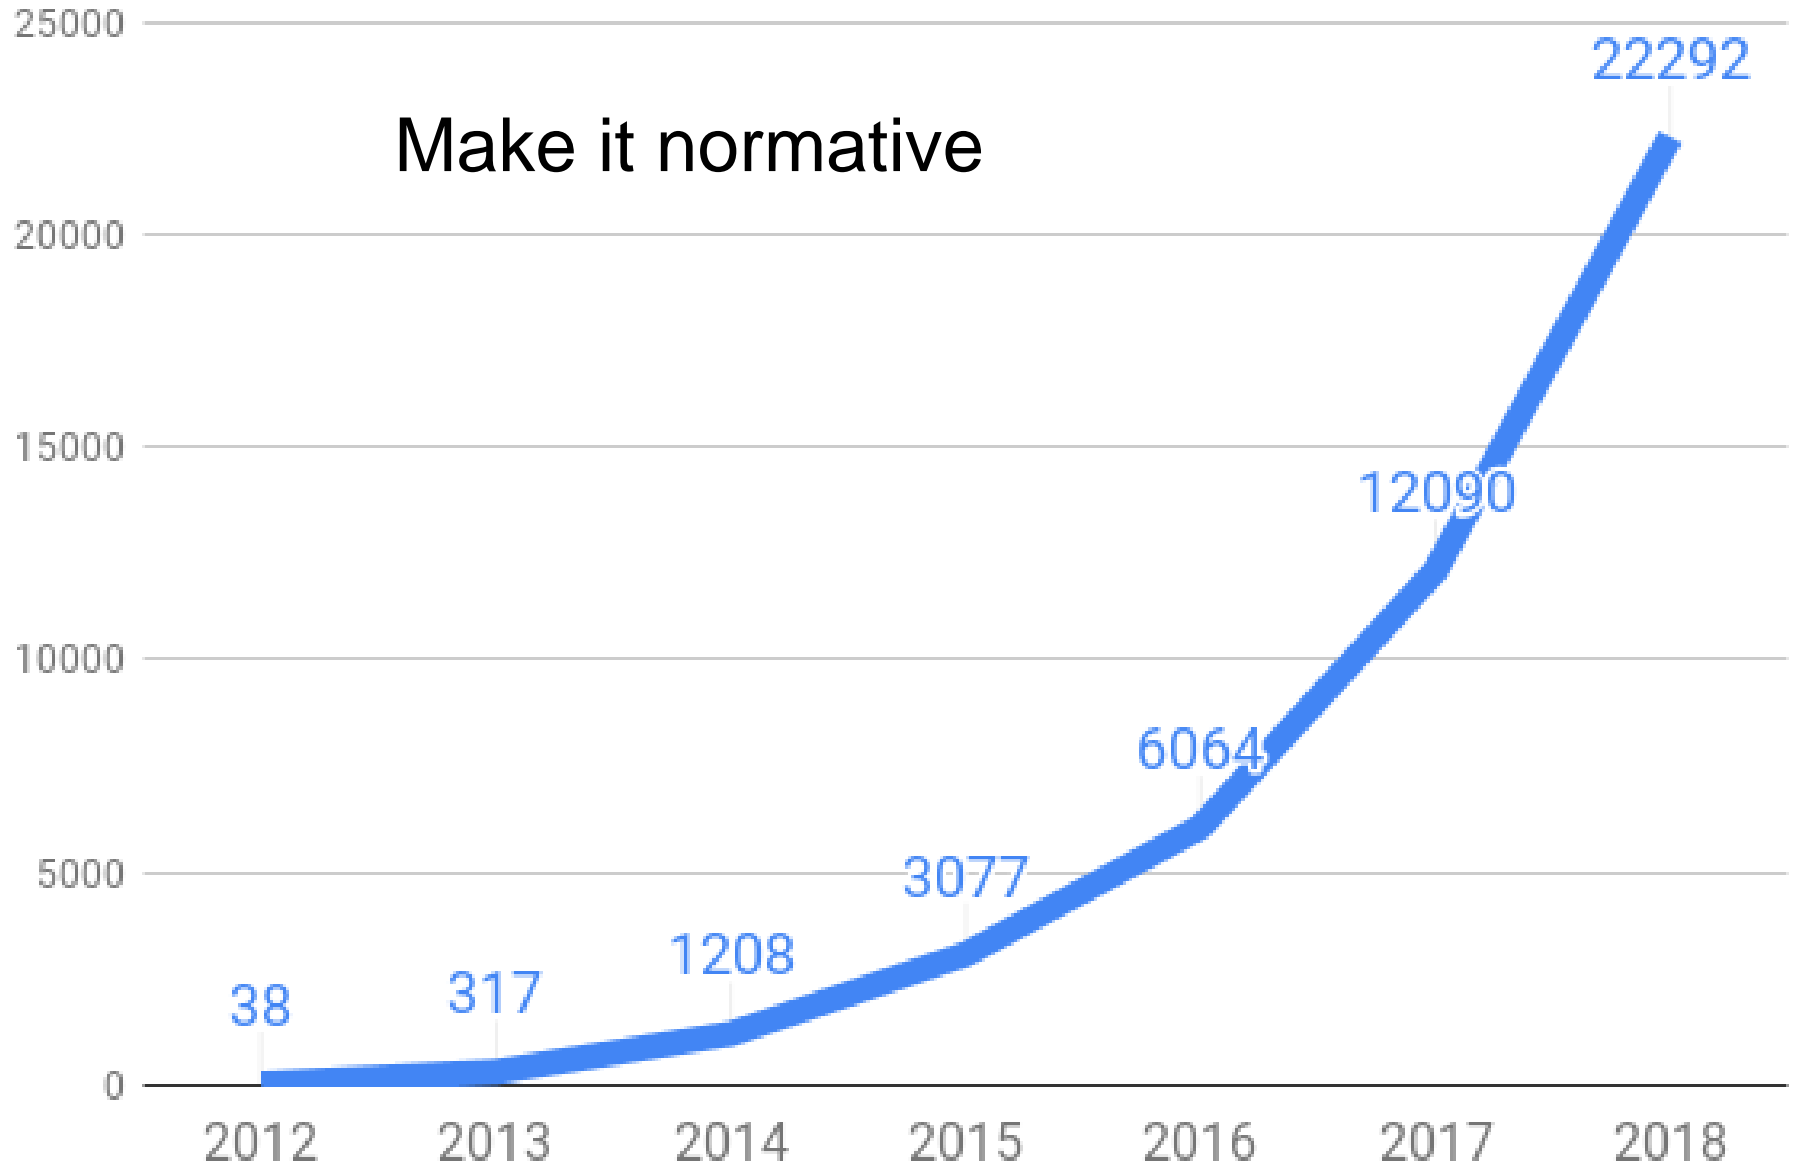

# Registered Reports

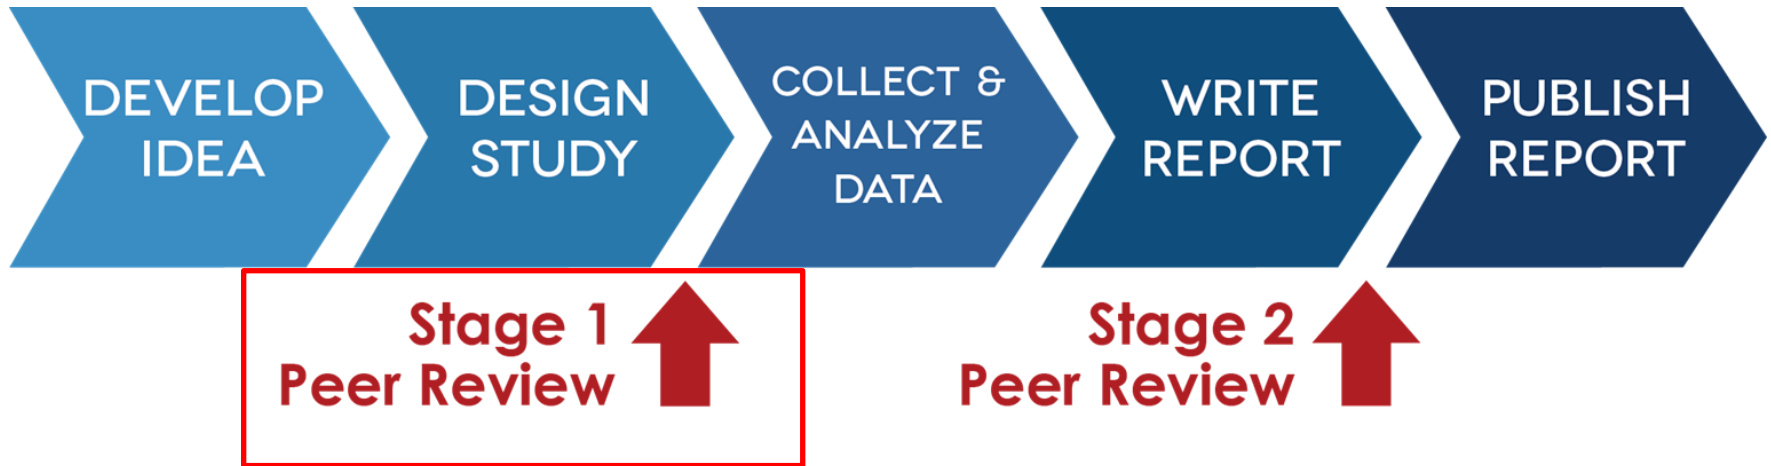

- **Authors submit a Stage 1 manuscript:**
- Introduction
- Proposed Methods & Analyses
- Pilot Data (if applicable)

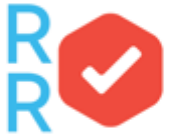

# Registered Reports

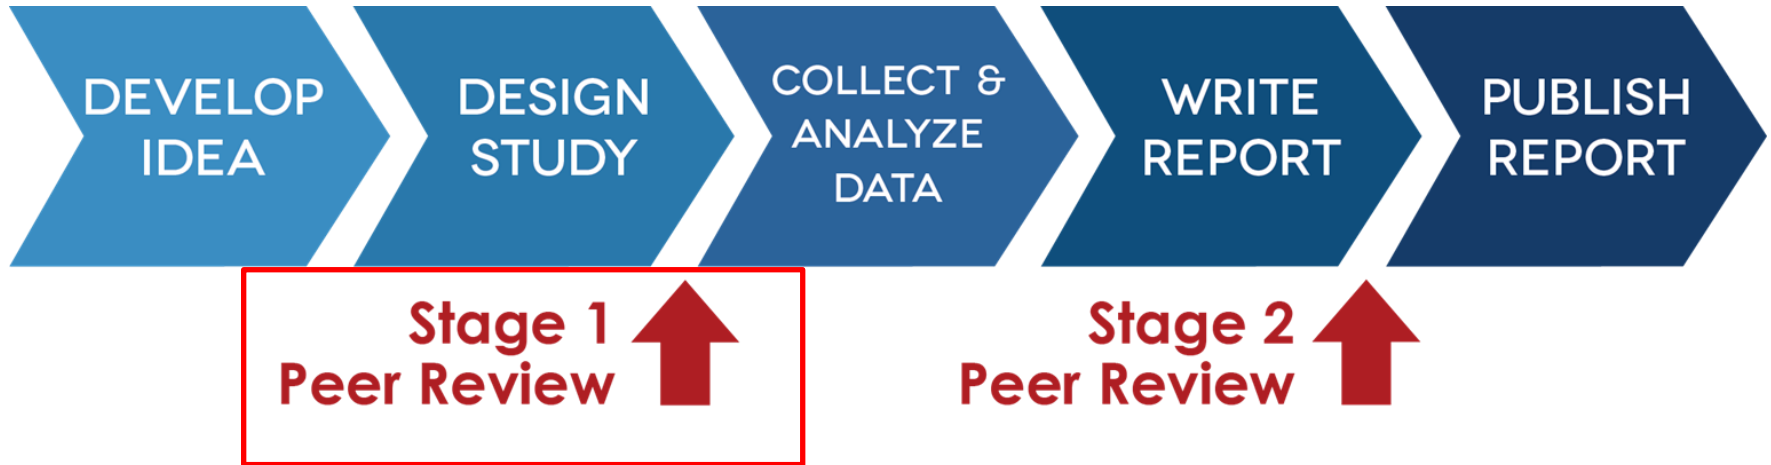

If **YES**, then study is granted “in principle acceptance” (IPA), a promise to publish regardless of outcome.

# Registered Reports

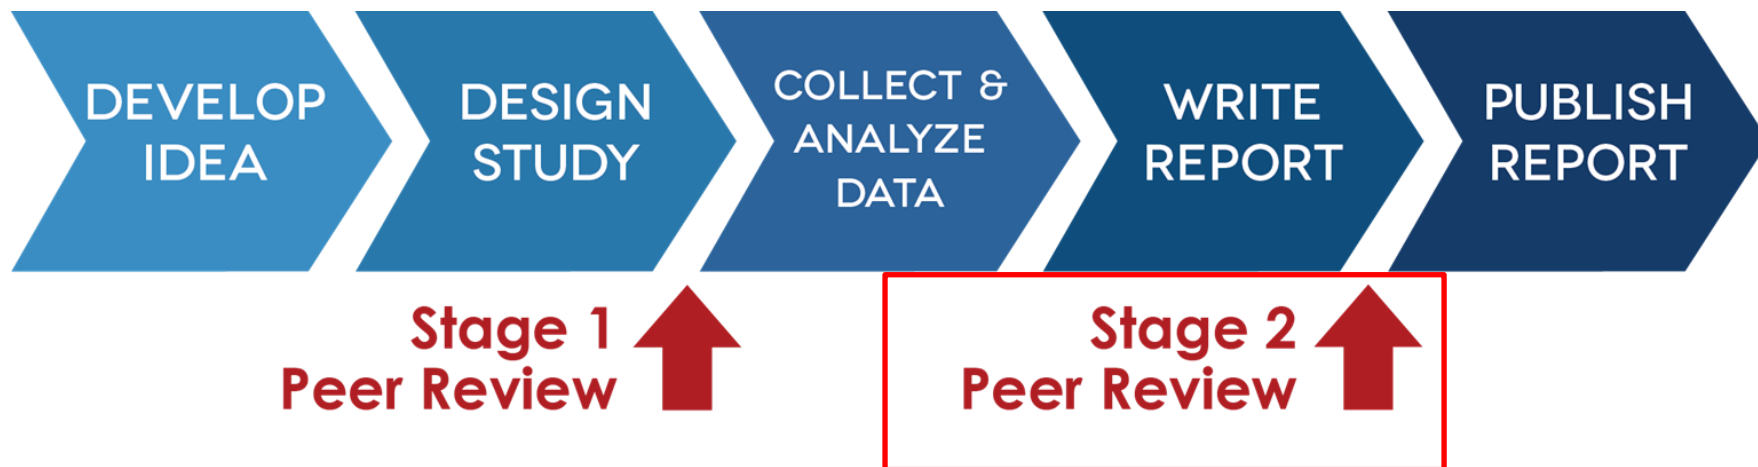

- **Authors submit Stage 2 Results**
- Introduction and Methods (virtually unchanged)
- Results (new): Registered, confirmatory findings + unregistered, exploratory findings
- Discussion (new)
- Data and materials deposition (ideally)



# Registered Reports

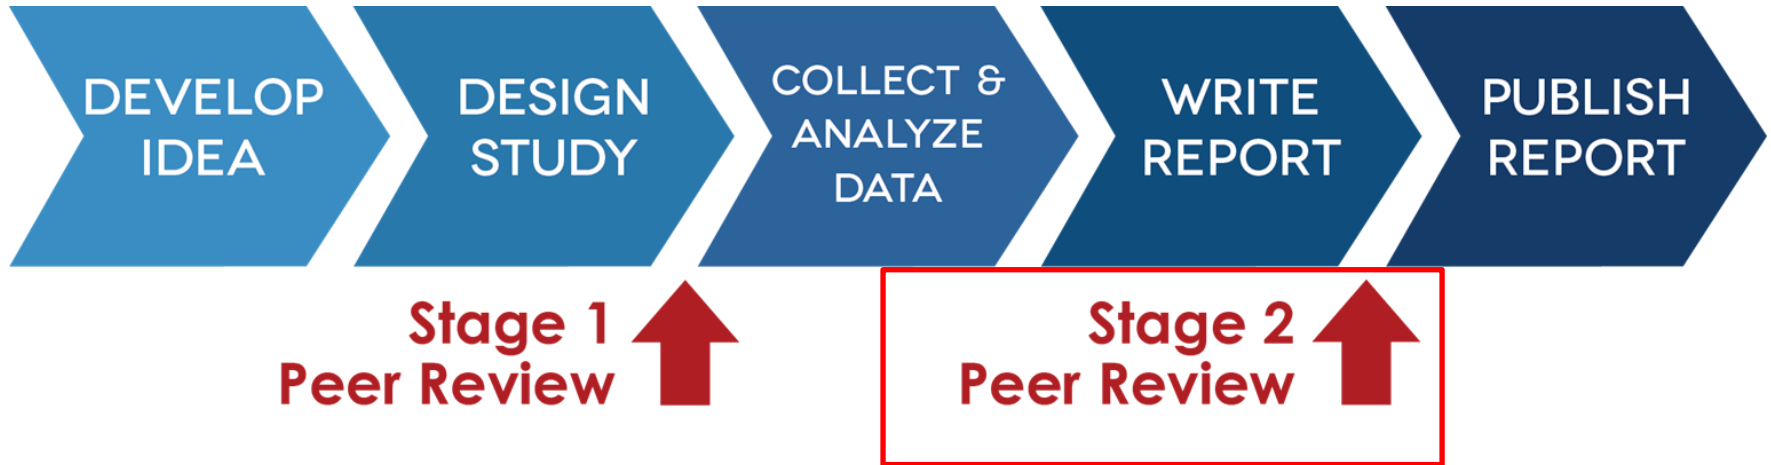

- Reviewers evaluate:
- Did positive controls succeed?
- Are the conclusions justified by the data?

# None of these things matter

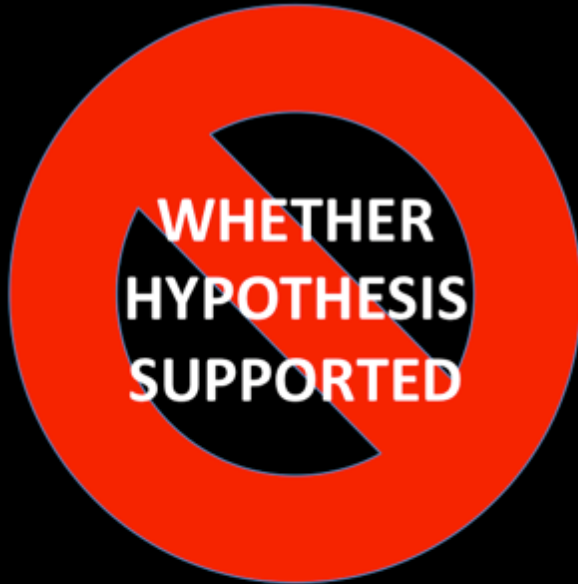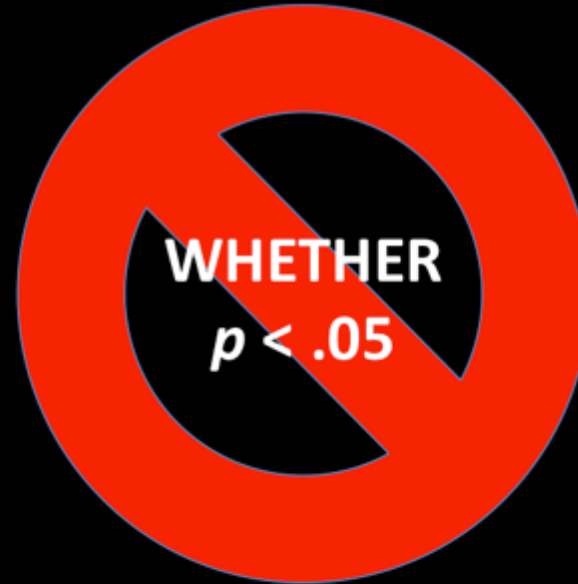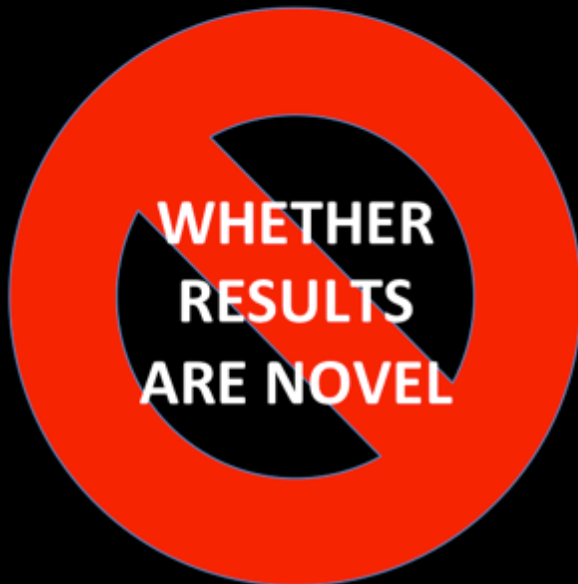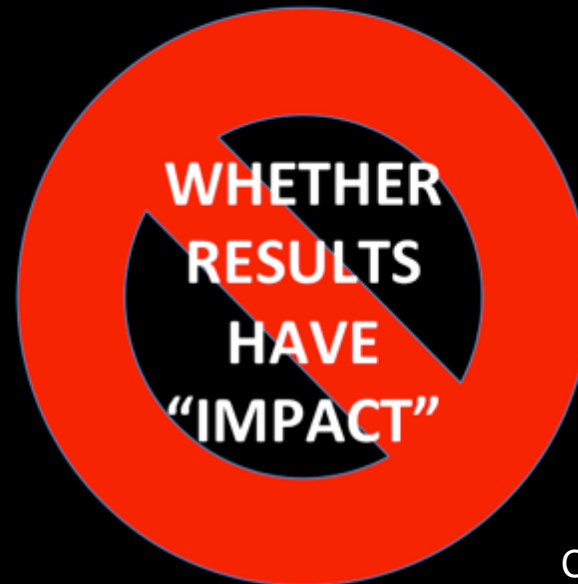

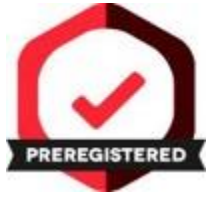

# Preregistration v. Registered Reports

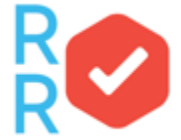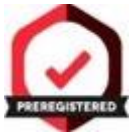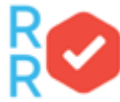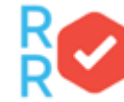

- Addresses unreported flexibility in conducting statistical analyses.
- Makes a clear distinction between planned, confirmatory research and unplanned, discovery research.
- Address publication bias against null results
- Includes a 2 stage peer review process where methods can be improved prior to conducting a study

# Advantages of Registered Reports

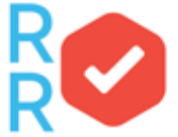

## Reproducible

- Detailed, repeatable methods
- High statistical power

## Transparent

- Often include open data and materials
- Clear distinction between confirmatory and discovery

## Credible

- No hindsight bias
- No publication bias or selective reporting
- Allows for null results, which improves meta-analyses

# Advantages of Registered Reports



## **Early peer review**

- Occurs when feedback can improve design

## **More efficient**

- Shopping an article around wastes author and reviewer time

## **More ideal**

- Focused on what science and scientists care about
- More collaborative.

# Registered Reports are now mainstream

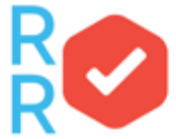

- **192** journals have adopted them so far
- **Life/medical sciences:** neuroscience, nutrition, psychology, psychiatry, biology, cancer research, ecology, endocrinology, clinical & preclinical medicine
- **Social sciences:** political science, financial and accounting research
- **Physical sciences:** chemistry, physics, computer science

Study preregistrations on the Open Science Framework (OSF) are doubling every year; more than 120 journals have introduced registered reports.

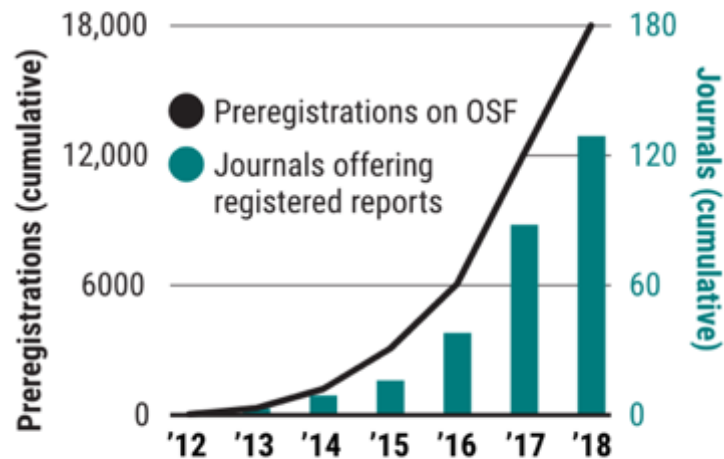

J. YOU/SCIENCE

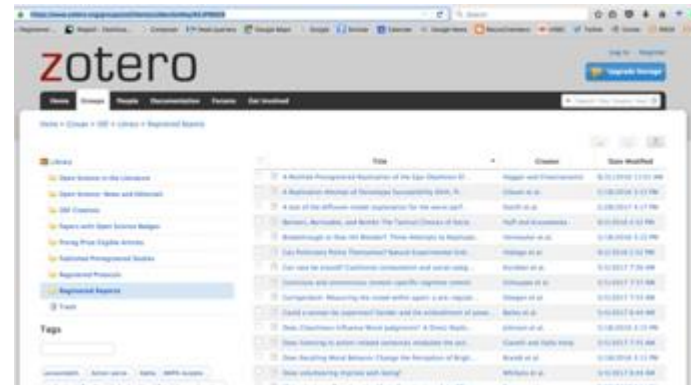

<http://bit.ly/zoteroRR>

~150 fully completed RRs have been published so far

# Registered Reports appear to be working as intended

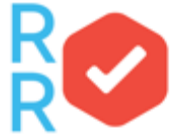

NEWS • 24 OCTOBER 2018

## First analysis of 'pre-registered' studies shows sharp rise in null findings

*Logging hypotheses and protocols before performing research seems to work as intended: to reduce publication bias for positive results.*

### REGISTERED REPORTS CUT PUBLICATION BIAS

Pre-registering research protocols in a 'registered reports' format could lead to less publication bias skewed towards positive results. Studies that pre-register their protocols publish more negative findings that don't support their hypothesis, than those that don't.

#### HYPOTHESES NOT SUPPORTED BY RESEARCH PAPERS (%)

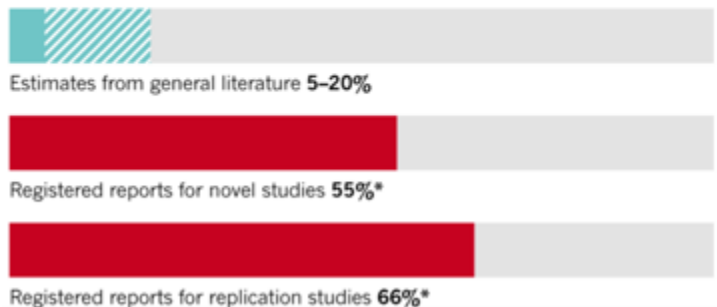

Hypotheses at at least three times more likely to be **disconfirmed** in Registered Reports compared with regular articles

#### % citations relative to JIF

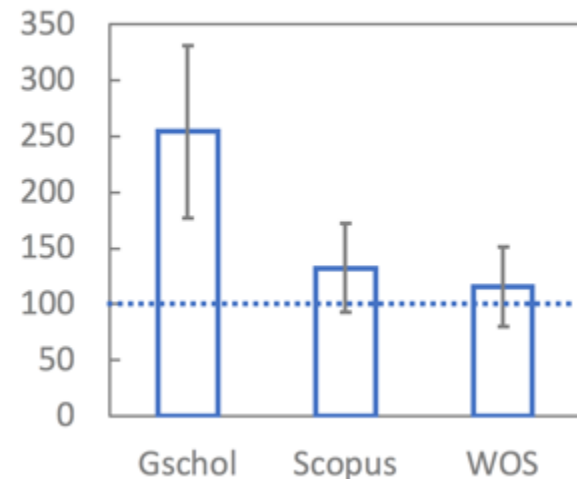

Well cited -- at or above respective journal impact factor

<https://tinyurl.com/RR-citations>

# Curated resources hub at [cos.io/rr](https://cos.io/rr)



Registered Reports: Peer review before results are known to align scientific values and practices.

Registered Reports

Participating Journals

Details & Workflow

Resources for Editors

For Funders

FAQ

Allied Initiatives

Registered Reports emphasize the importance of the research question and the quality of methodology by conducting peer review prior to data collection. High quality protocols are then provisionally accepted for publication if the authors follow through with the registered methodology.

This format is designed to reward best practices in adhering to the hypothetico-deductive model of the scientific method. It eliminates a variety of questionable research practices, including low statistical power, selective reporting of results, and publication bias, while allowing complete flexibility to report serendipitous findings.

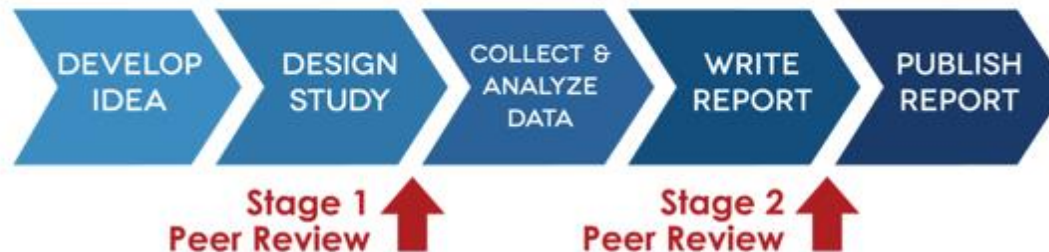



# Transparency and Openness Promotion (TOP) Guidelines

---

Eight policy statements for increasing the transparency and reproducibility of the published research.

- Agnostic to discipline
- Low barrier to entry
- Modular

Three Tiers

1

2

3

Eight Standards

Data citation

Materials transparency

Data transparency

Code transparency

Design transparency

Study Preregistration

Analysis Preregistration

Replication

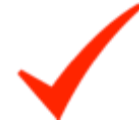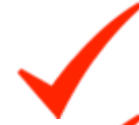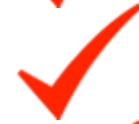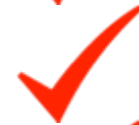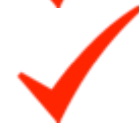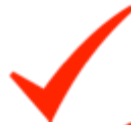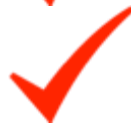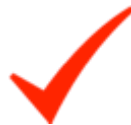

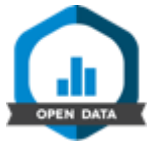

# Data sharing

1

Article states whether data are available, and, if so, where to access them

2

Data must be posted to a trusted repository. Exceptions must be identified at article submission.

3

Data must be posted to a trusted repository, and reported analyses will be reproduced independently prior to publication.

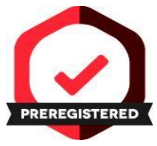

# Preregistration

1

Article states whether a preregistration exists.

2

If a preregistration exists, there is a check prior to results publication to ensure compliance with plan (or transparent changes).

3

Empirical studies must have a preregistration

# Signals: Making Behaviors Visible Promotes Adoption

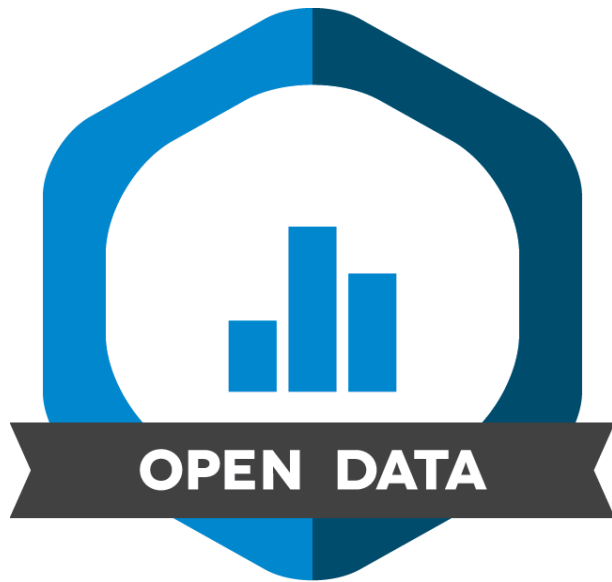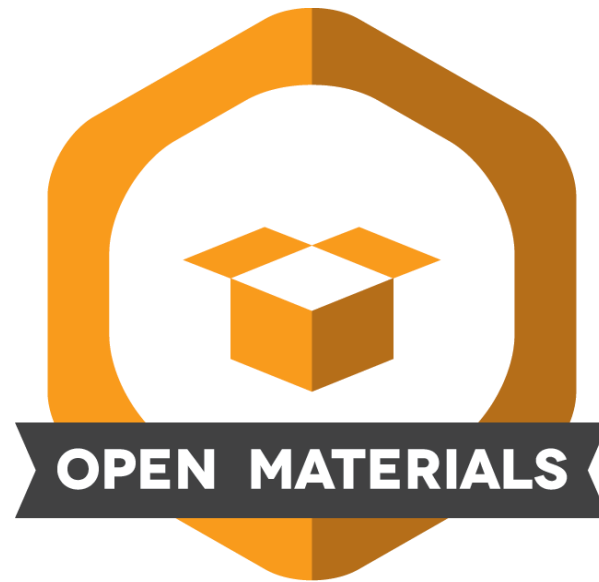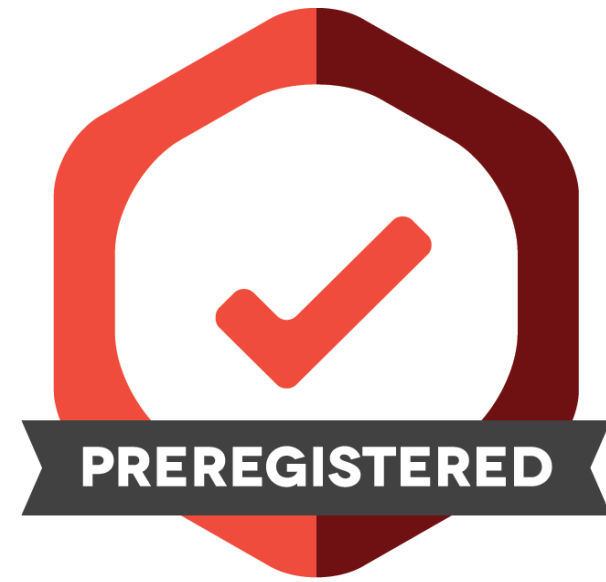

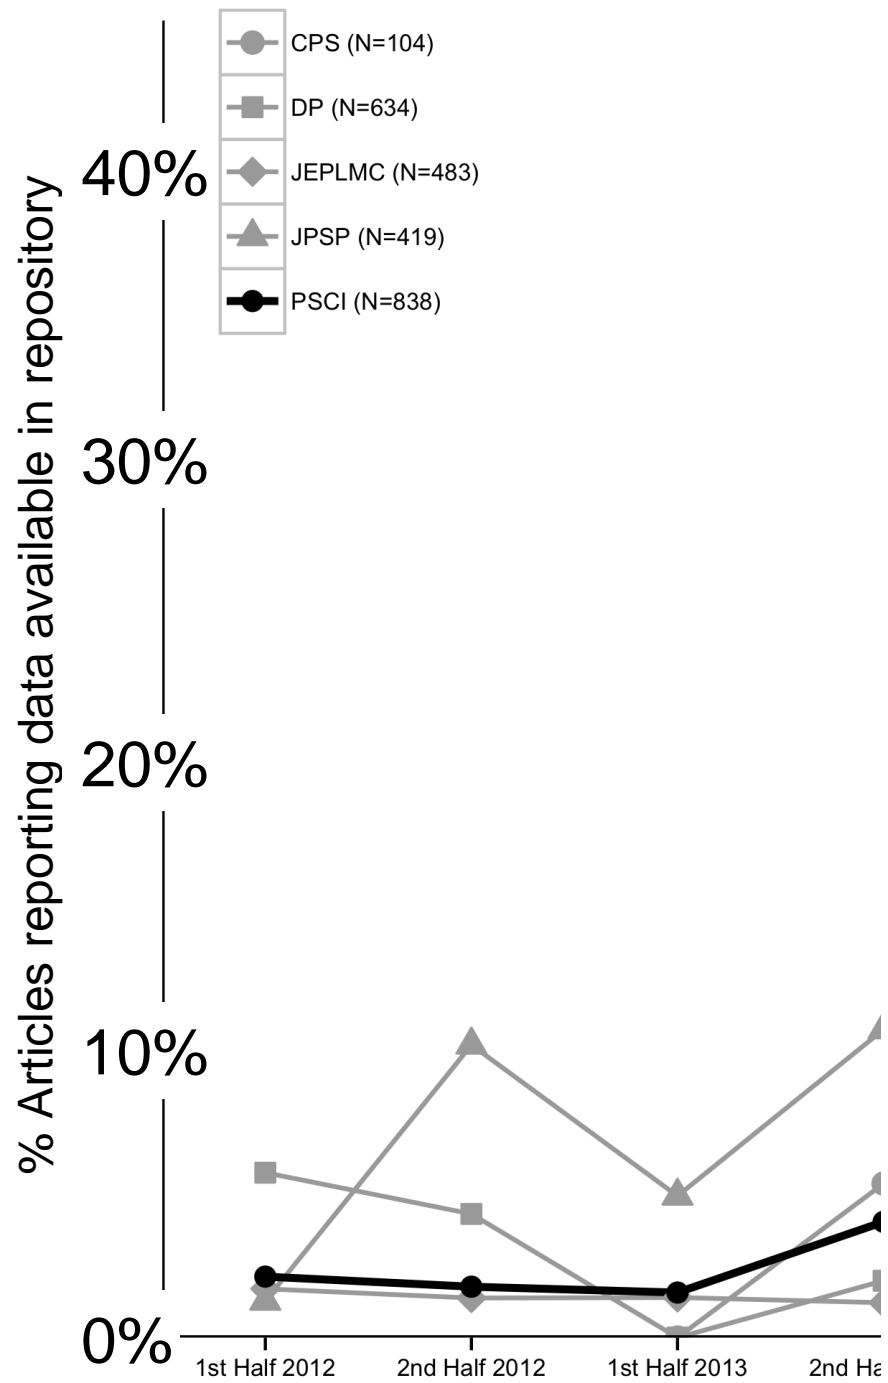

**Fig 4. Actually available, correct, usable, and complete data.**

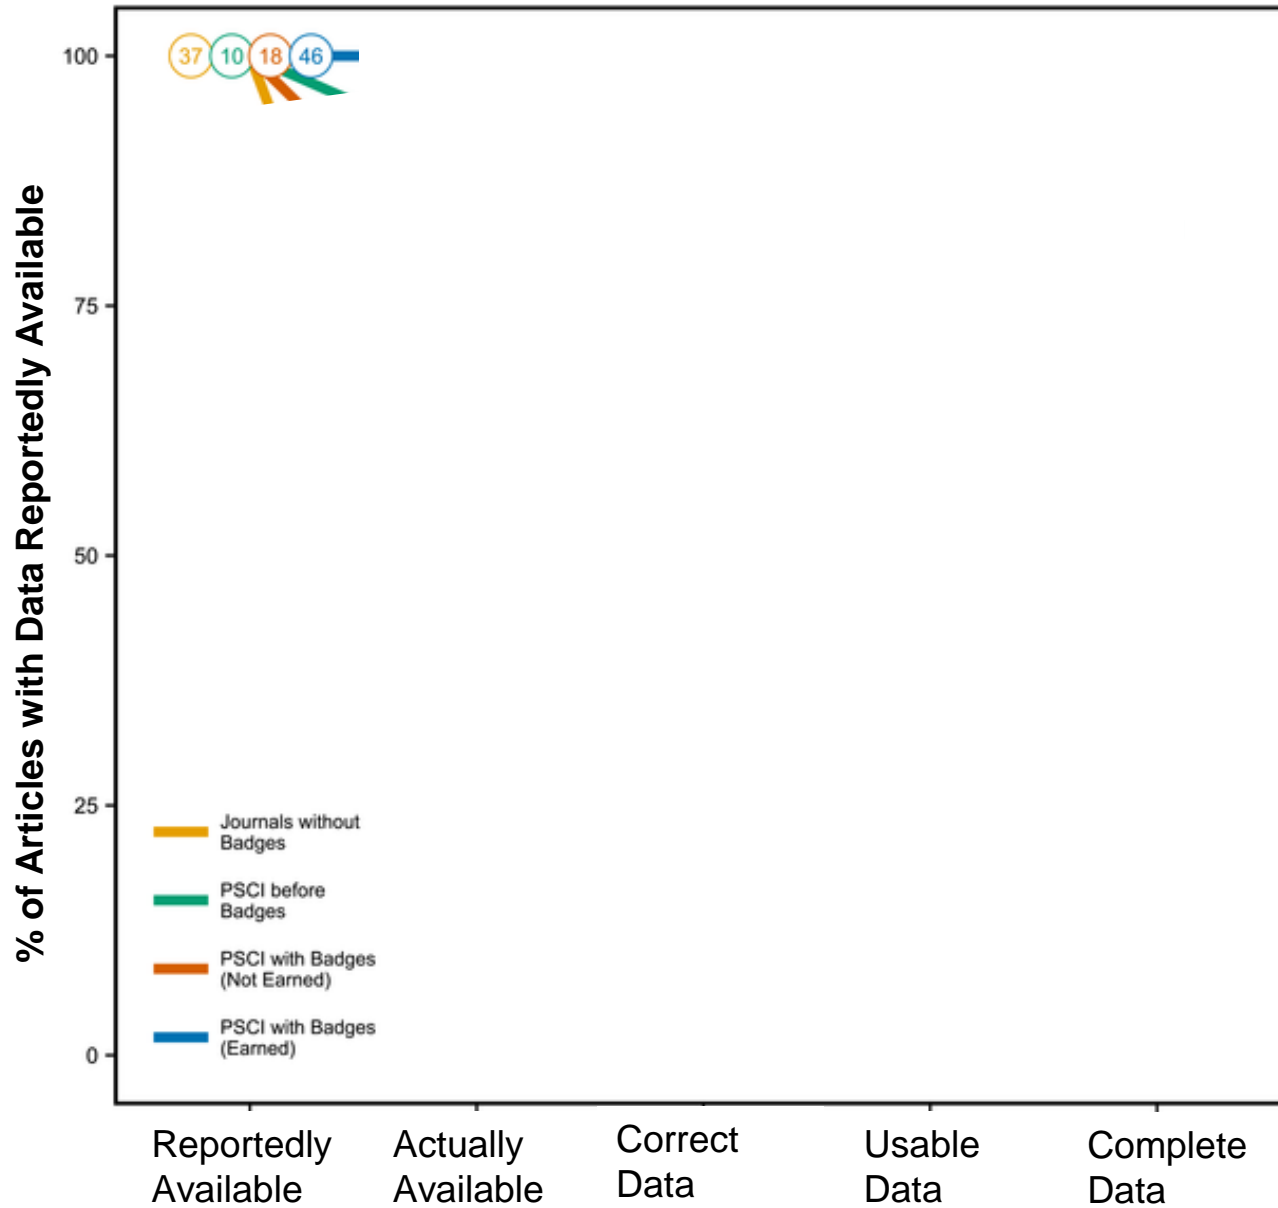

aps

# Psychological SCIENCE

A JOURNAL OF THE ASSOCIATION FOR PSYCHOLOGICAL SCIENCE

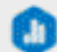

OPEN DATA

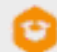

OPEN MATERIALS

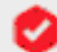

PREREGISTERED

**Volume 30 | Number 2 | February 2019**

*The links below take you to the journal via the APS website. If not already logged in, you will be redirected to log-in using your last name and Member ID (16341). Be sure to download pictures to see Open Science badges.*

## RESEARCH ARTICLES

### [Extremeness Aversion Is a Cause of Anchoring](#)

*Joshua Lewis, Celia Gaertig, and Joseph P. Simmons*

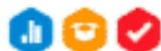

### [Patterns of Implicit and Explicit Attitudes: I. Long-Term Change and Stability From 2007 to 2016](#)

*Tessa E. S. Charlesworth and Mahzarin R. Banaji*

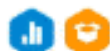



Thank you!

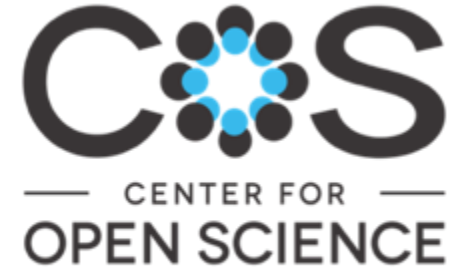

Resources for Registered Reports, preregistration, Open Science Badges, at <https://cos.io>

Find me online @EvoMellor or email: [david@cos.io](mailto:david@cos.io)

Find this presentation at:  
<https://osf.io/m28gf>
